# Supplementary material for: Hygroscopic Ground-Based Generator Cloud Seeding Design; A Case Study from the 2020 Weather Modification in Larona Basin Indonesia
Source: MDPI journal article supplement (doi:10.3390/atmos13060968), 2022-06-15
Supplement: s1 [file s1]

Archive with 13 entries (13 files):
- Weekly Report - 01.pdf
- Weekly Report - 02.pdf
- Weekly Report - 03.pdf
- Weekly Report - 04.pdf
- Weekly Report - 05.pdf
- Weekly Report - 06.pdf
- Weekly Report - 07.pdf
- Weekly Report - 08.pdf
- Weekly Report - 09.pdf
- Weekly Report - 10.pdf
- Weekly Report - 11.pdf
- Weekly Report - 12.pdf
- Weekly Report - 13.pdf
