# Supplementary material for: Hygroscopic Ground-Based Generator Cloud Seeding Design; A Case Study from the 2020 Weather Modification in Larona Basin Indonesia
Source: MDPI journal article supplement (doi:10.3390/atmos13060968), 2022-06-15

**Weekly Report (#1)**  
**9 February – 15 February 2020**

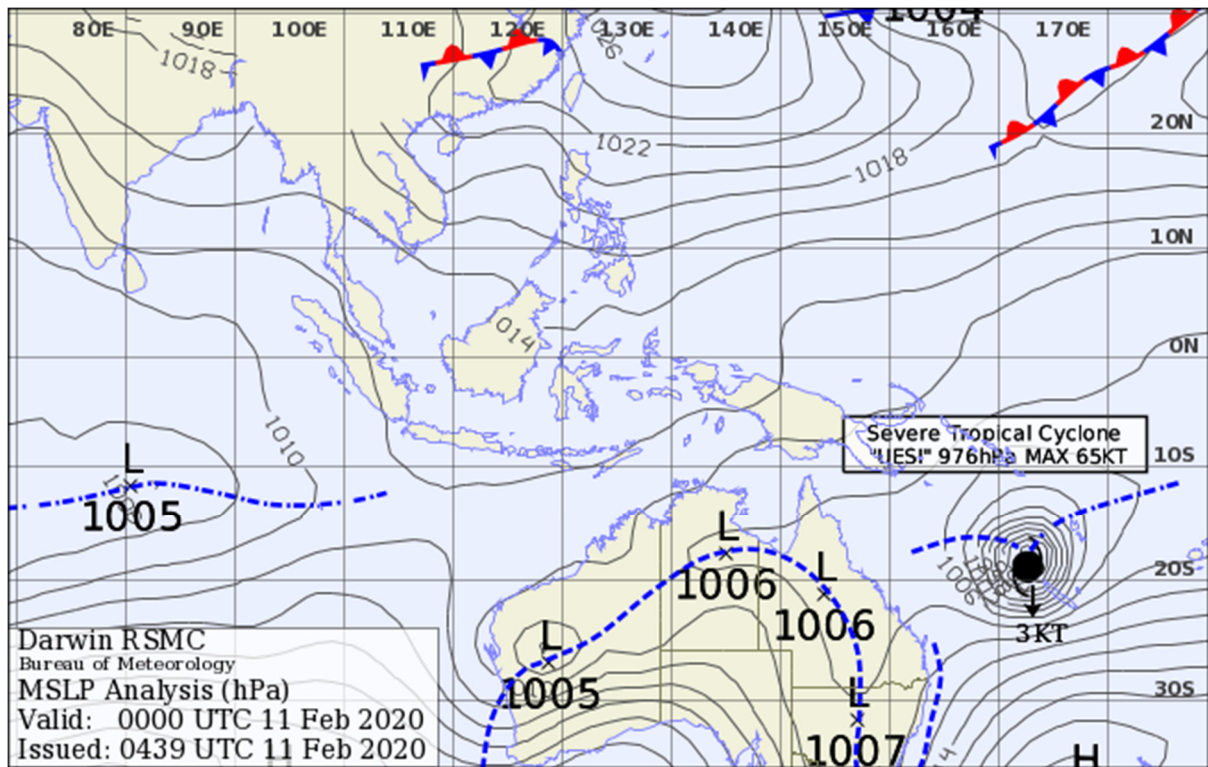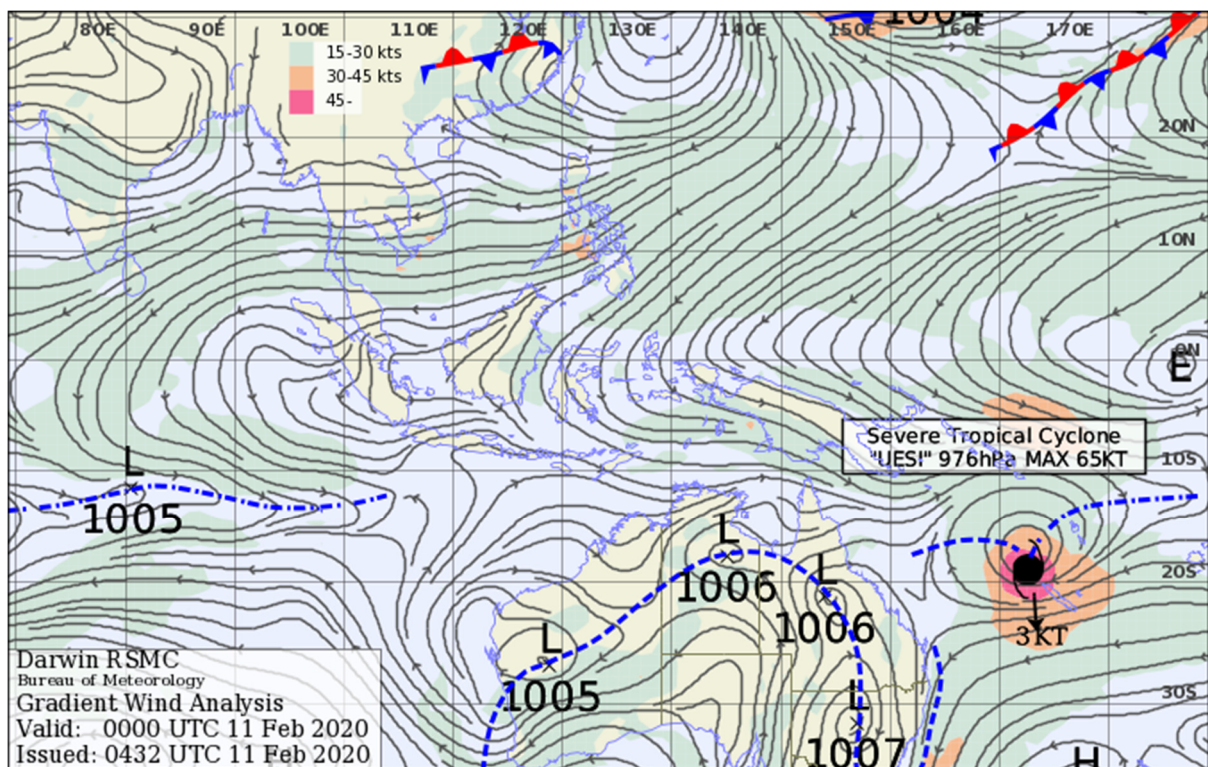

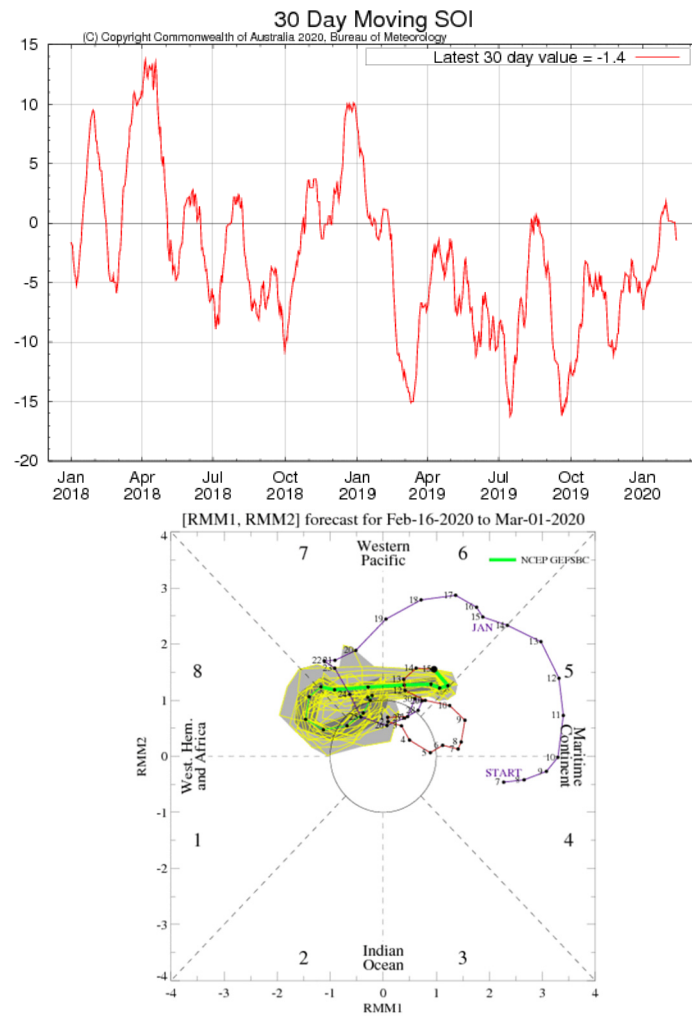

## Satellite Images (CIT = Central Indonesian Time)

**9 February 2020, 20:40 CIT**

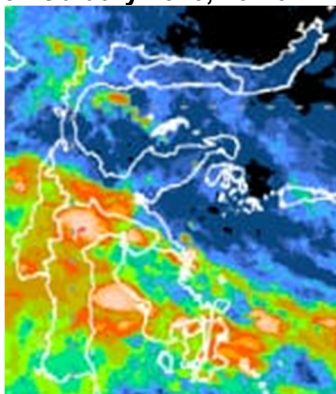

**10 February 2020, 17:10 CIT**

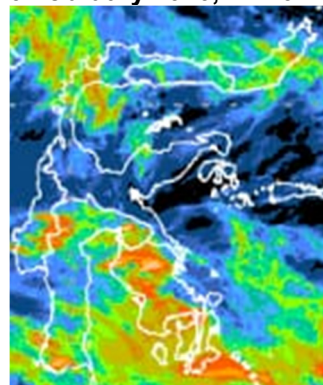

11 February 2020, 17:10 CIT

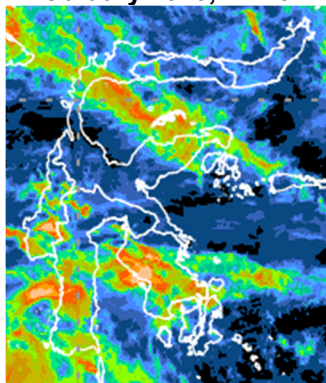

12 February 2020, 18:40 CIT

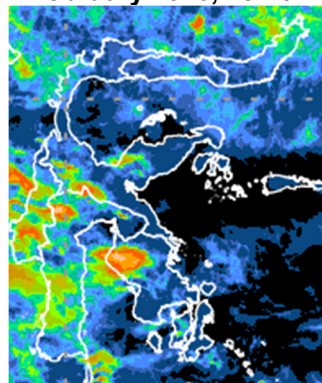

13 February 2020, 17:30 CIT

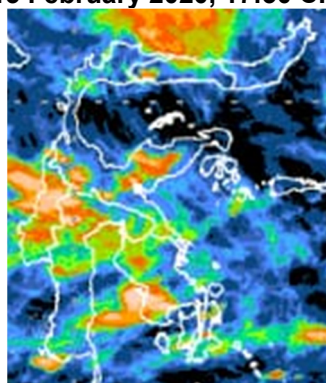

14 February 2020, 11:50 CIT

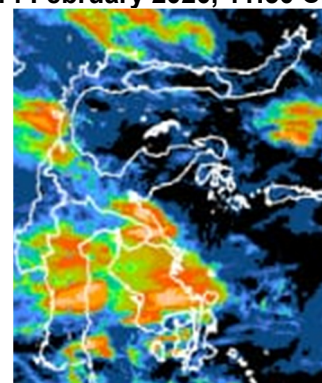

15 February 2020, 14:40 CIT

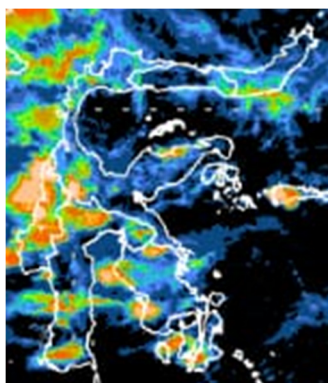

Supplement: s1 [file s1 › Weekly Report - 01.pdf]
