# Supplementary material for: Hygroscopic Ground-Based Generator Cloud Seeding Design; A Case Study from the 2020 Weather Modification in Larona Basin Indonesia
Source: MDPI journal article supplement (doi:10.3390/atmos13060968), 2022-06-15

**Weekly Report (#2)**  
**16 February – 22 February 2020**

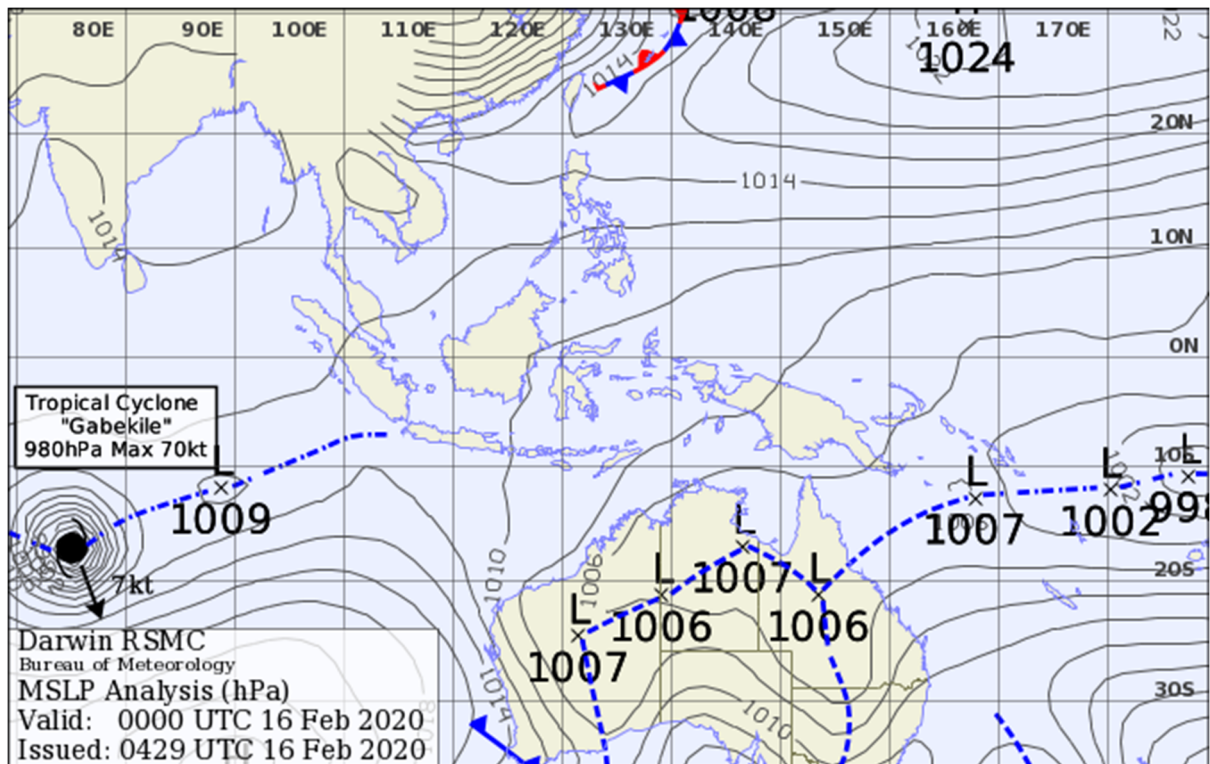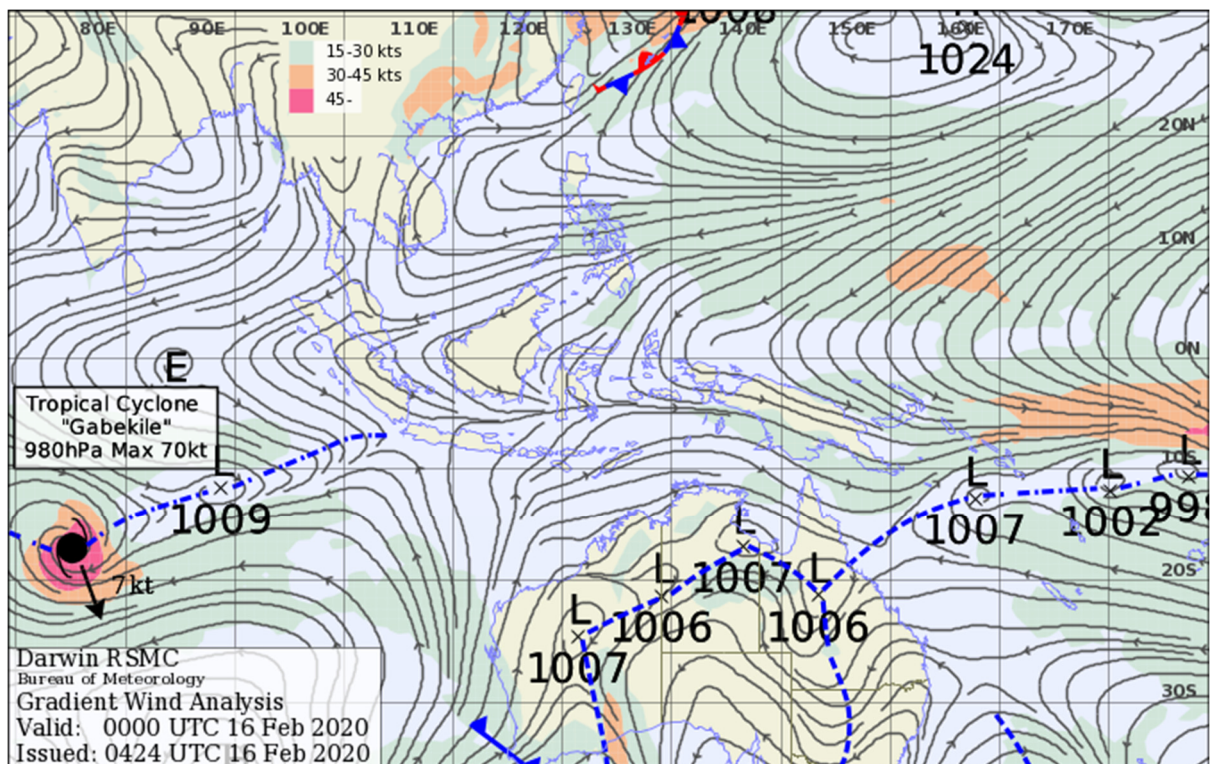

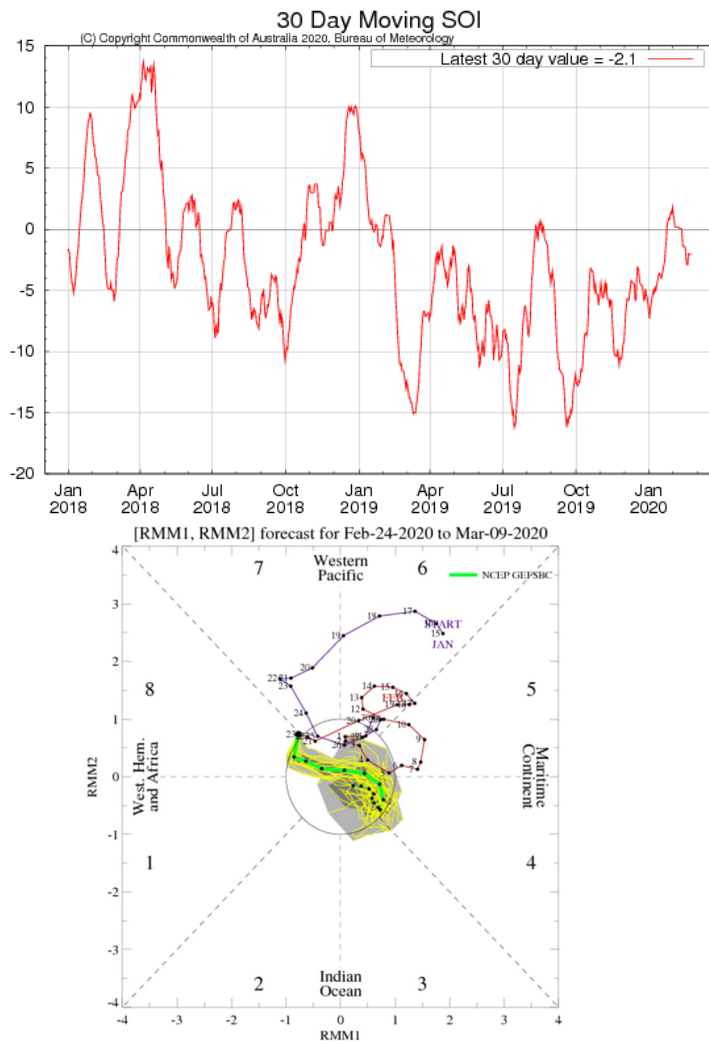

## Satellite Images (CIT = Central Indonesian Time)

**16 February 2020, 18:10 CIT**

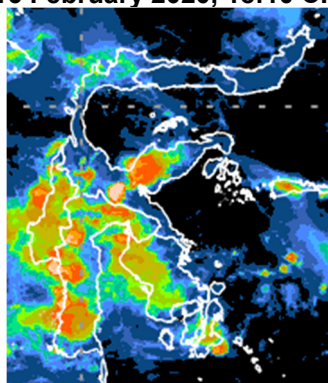

**17 February 2020, 17:40 CIT**

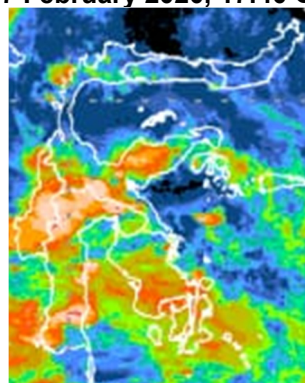

**18 February 2020, 17:10 CIT**

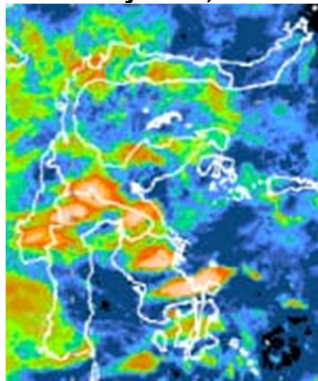

**19 February 2020, 17:50 CIT**

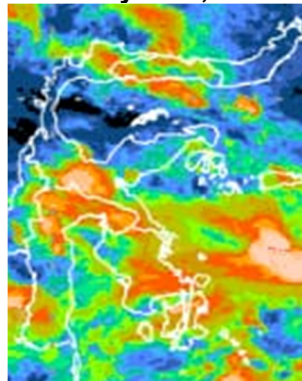

**20 February 2020, 15:30 CIT**

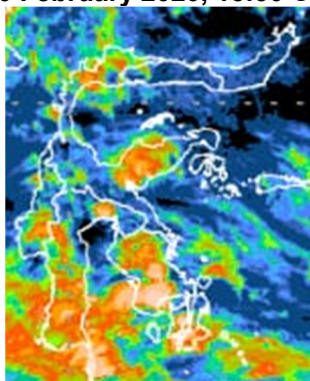

**21 February 2020, 16:20 CIT**

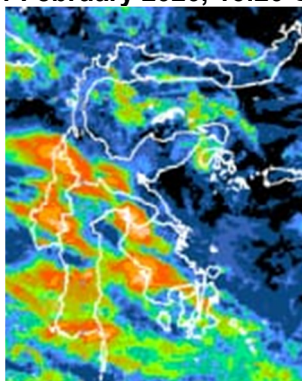

**22 February 2020, 18:00 CIT**

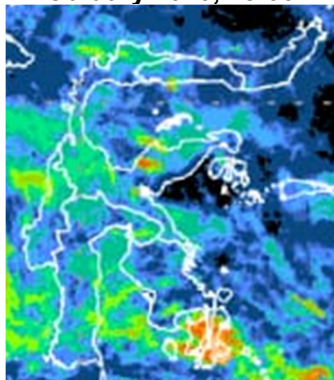

Supplement: s1 [file s1 › Weekly Report - 02.pdf]
