# Supplementary material for: Hygroscopic Ground-Based Generator Cloud Seeding Design; A Case Study from the 2020 Weather Modification in Larona Basin Indonesia
Source: MDPI journal article supplement (doi:10.3390/atmos13060968), 2022-06-15

*Weekly Report (#3)*  
*23 February – 29 February 2020*

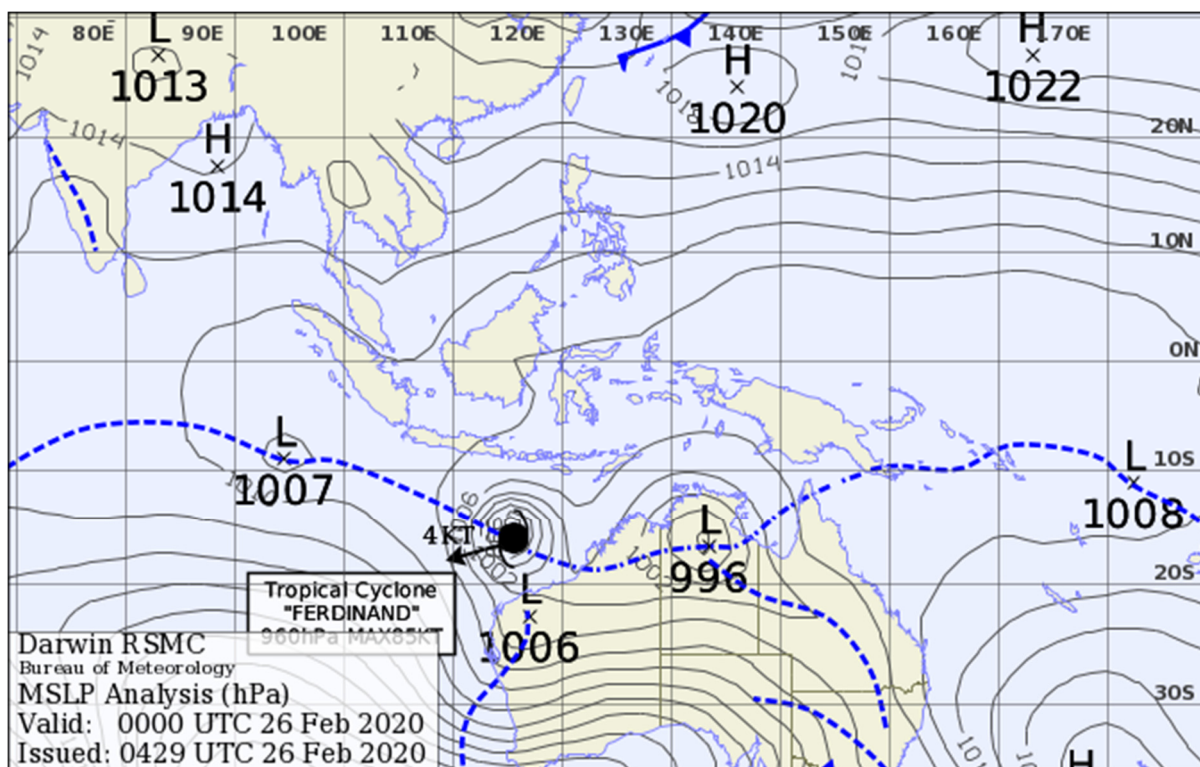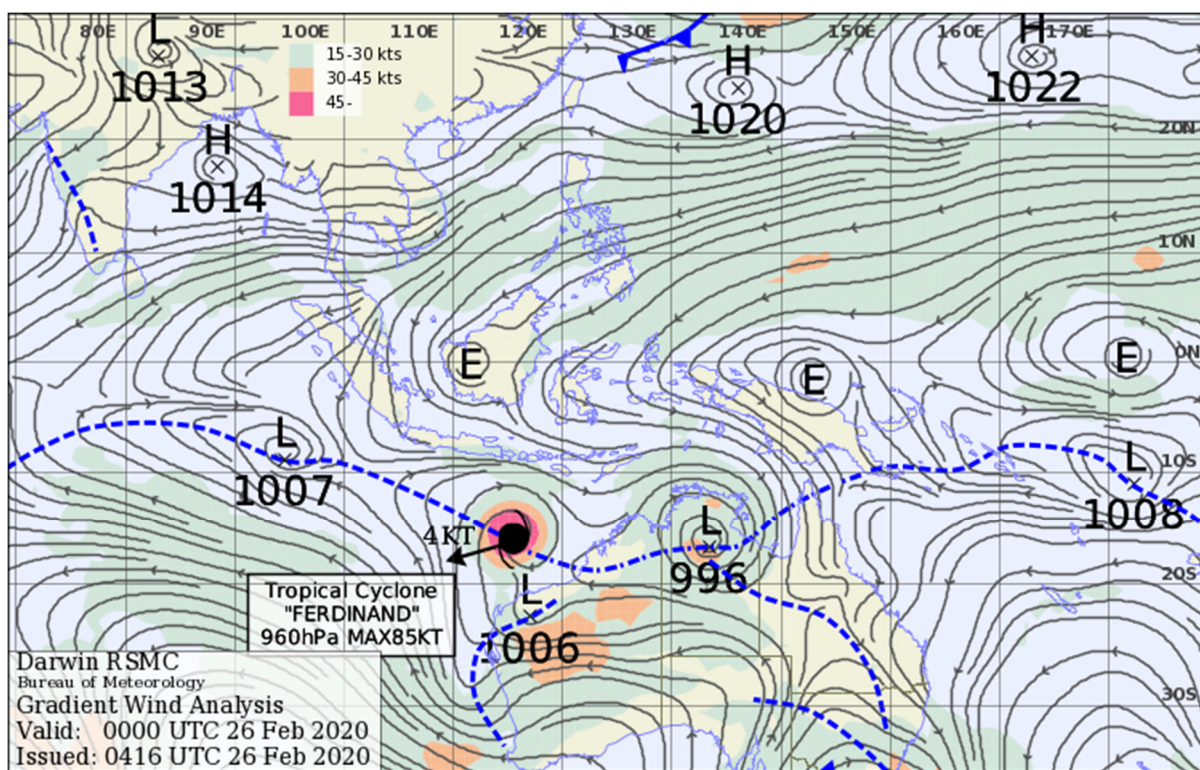

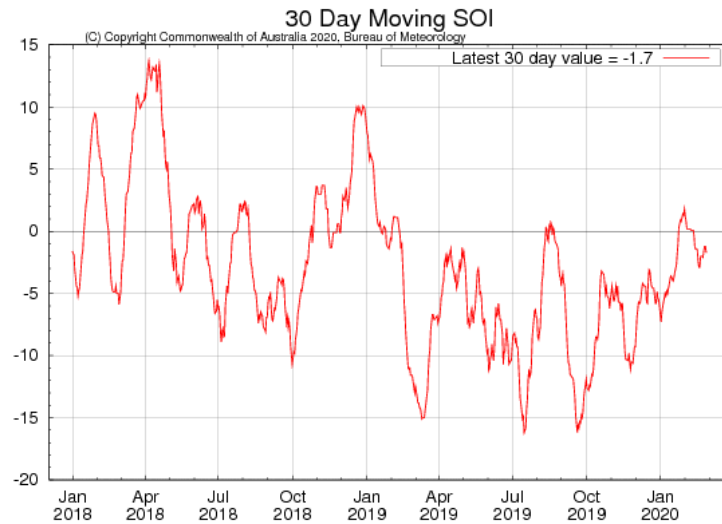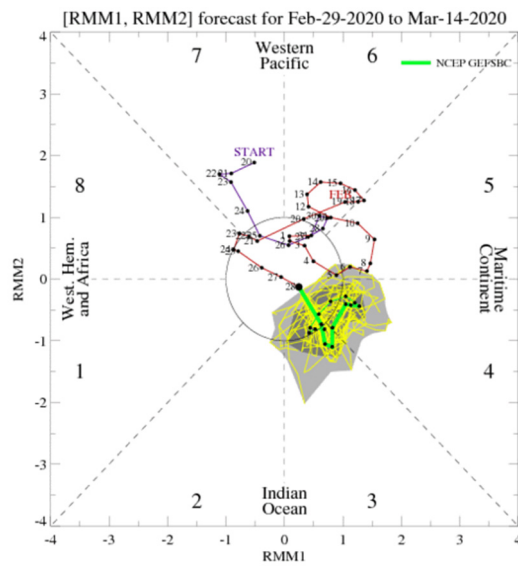

## Satellite Images

(CIT = Central Indonesian Time)  
23 February 2020, 12:10 CIT

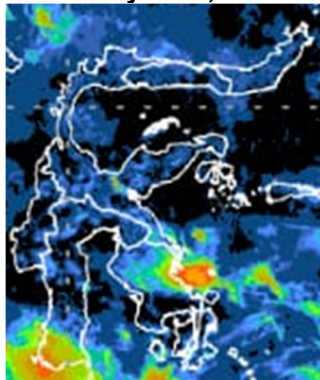

24 February 2020, 18:30 CIT

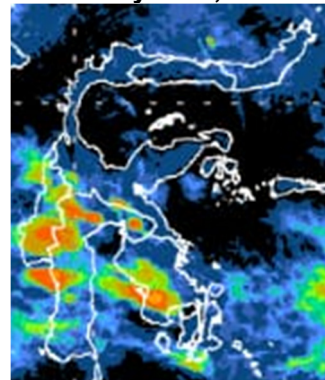

25 February 2020, 20:10 CIT

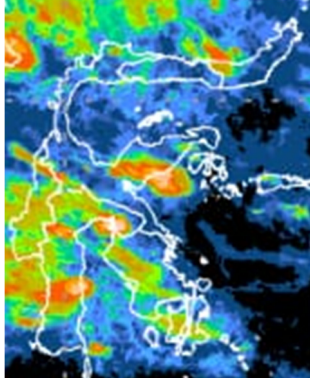

26 February 2020, 17:30 CIT

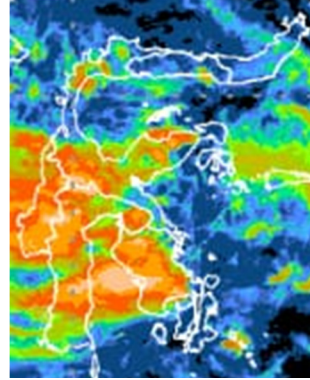

27 February 2020, 16:40 CIT

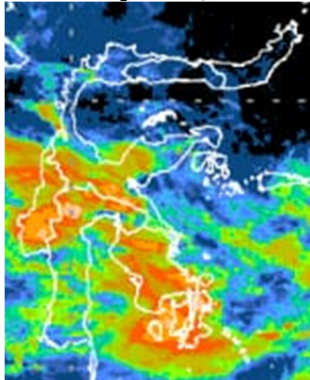

28 February 2020, 12:00 CIT

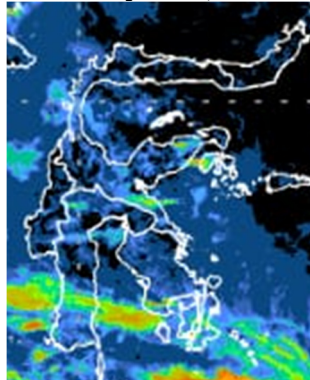

29 February 2020, 13:00 CIT

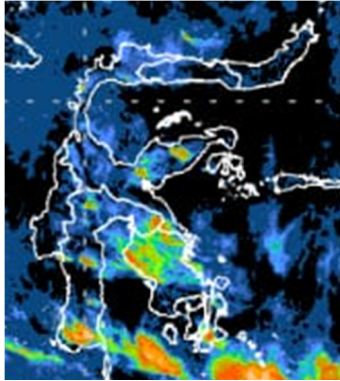

Supplement: s1 [file s1 › Weekly Report - 03.pdf]
