# Supplementary material for: Hygroscopic Ground-Based Generator Cloud Seeding Design; A Case Study from the 2020 Weather Modification in Larona Basin Indonesia
Source: MDPI journal article supplement (doi:10.3390/atmos13060968), 2022-06-15
Supplement: s1 [file s1 › Weekly Report - 04.pdf]

**Weekly Report (#4)**  
**01 March – 07 March 2020**

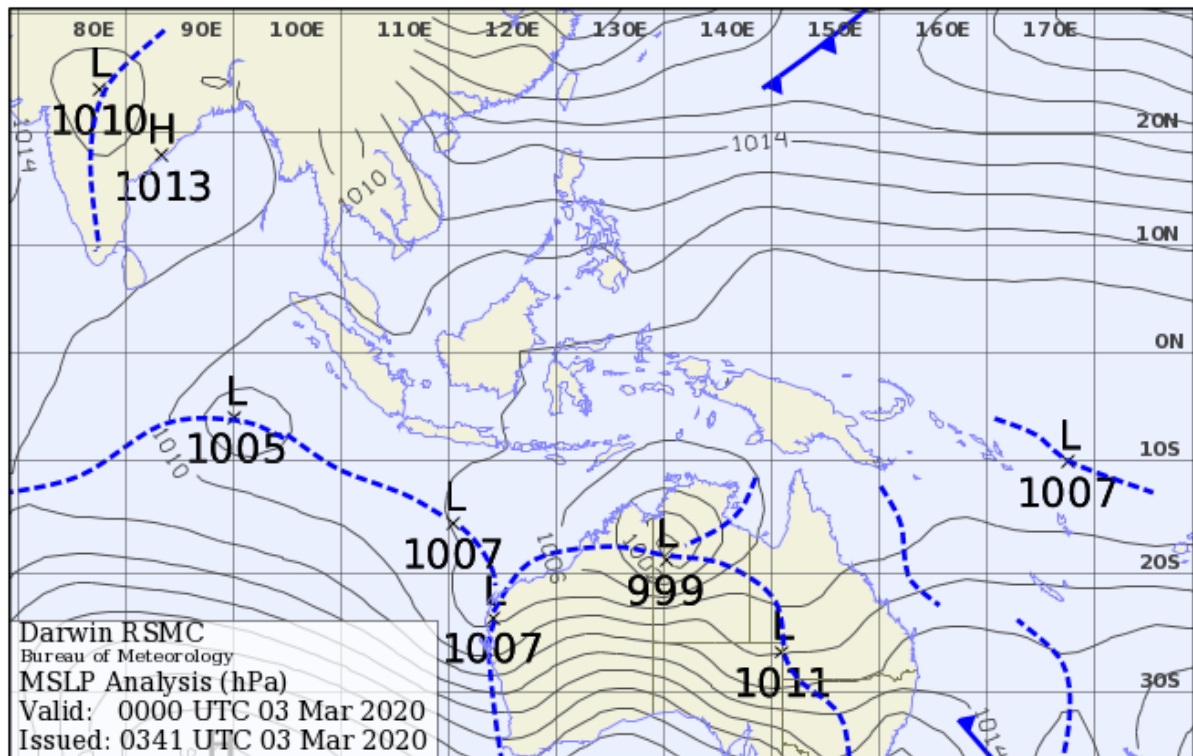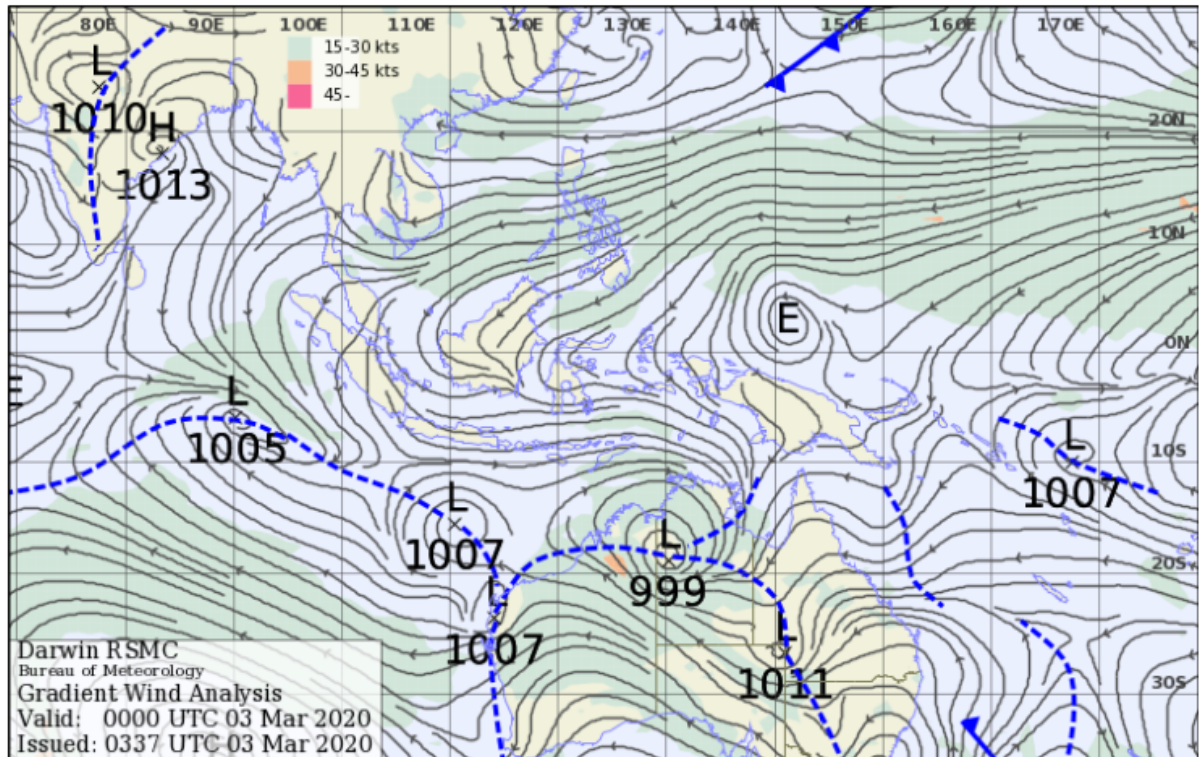

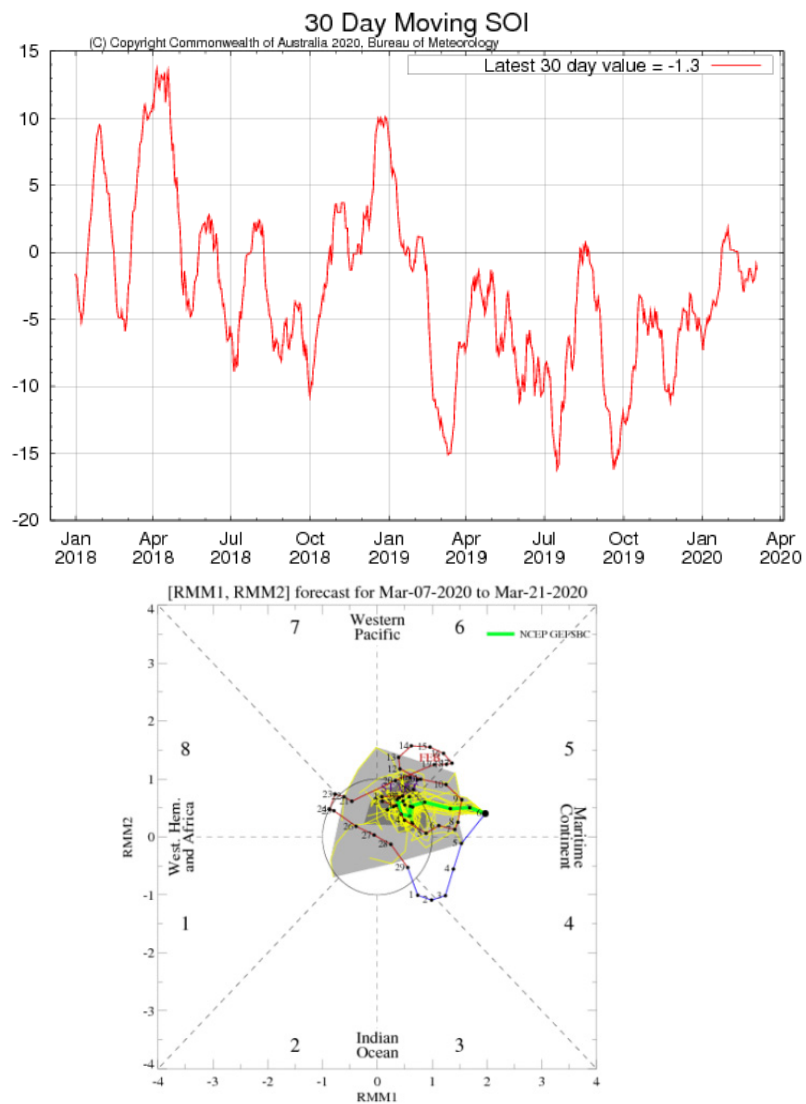

## Satellite Images

(CIT = Central Indonesian Time)

01 March 2020, 17:10 CIT

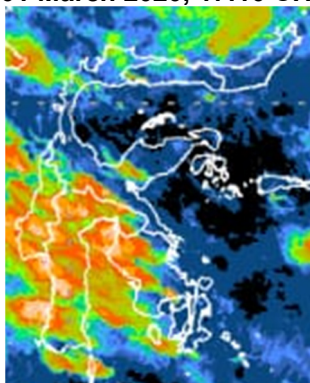

02 March 2020, 20:54 CIT

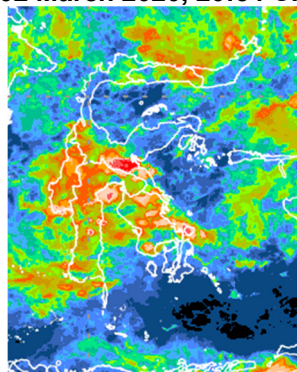

**03 March 2020, 18:40 CIT**

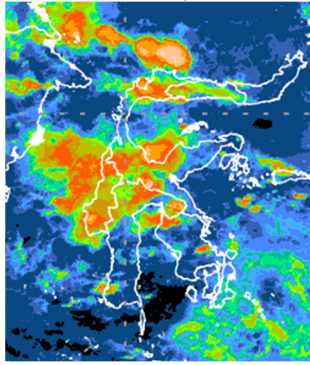

**04 March 2020, 12:40 CIT**

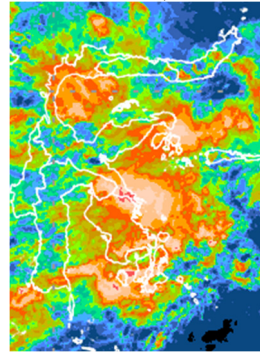

**05 March 2020, 13:20 CIT**

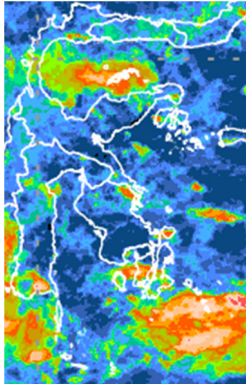

**07 March 2020, 11:20 CIT**

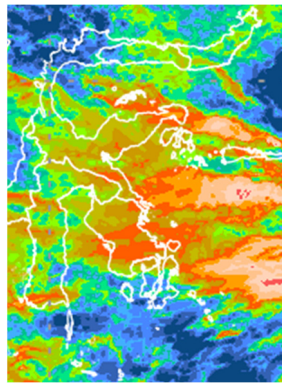

**06 March 2020**  
**Tidak Terdapat Awan Potensial**
