# Supplementary material for: Hygroscopic Ground-Based Generator Cloud Seeding Design; A Case Study from the 2020 Weather Modification in Larona Basin Indonesia
Source: MDPI journal article supplement (doi:10.3390/atmos13060968), 2022-06-15

*Weekly Report (#4)  
08 March – 14 March 2020*

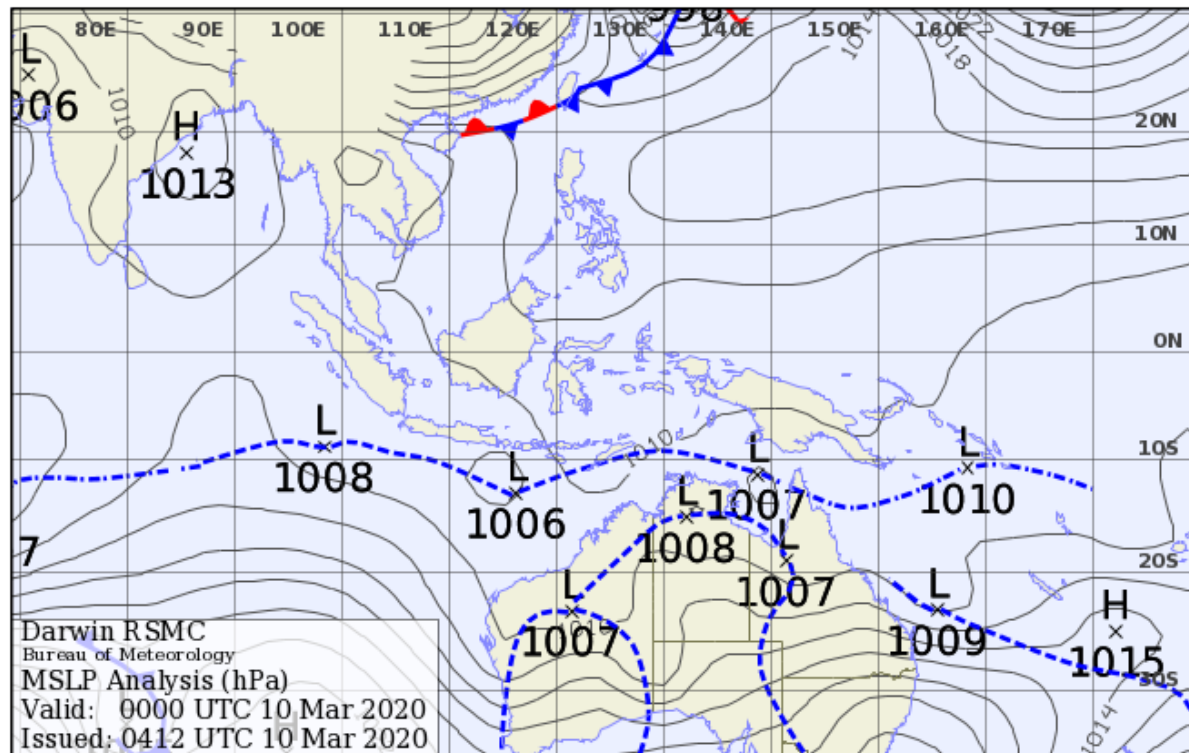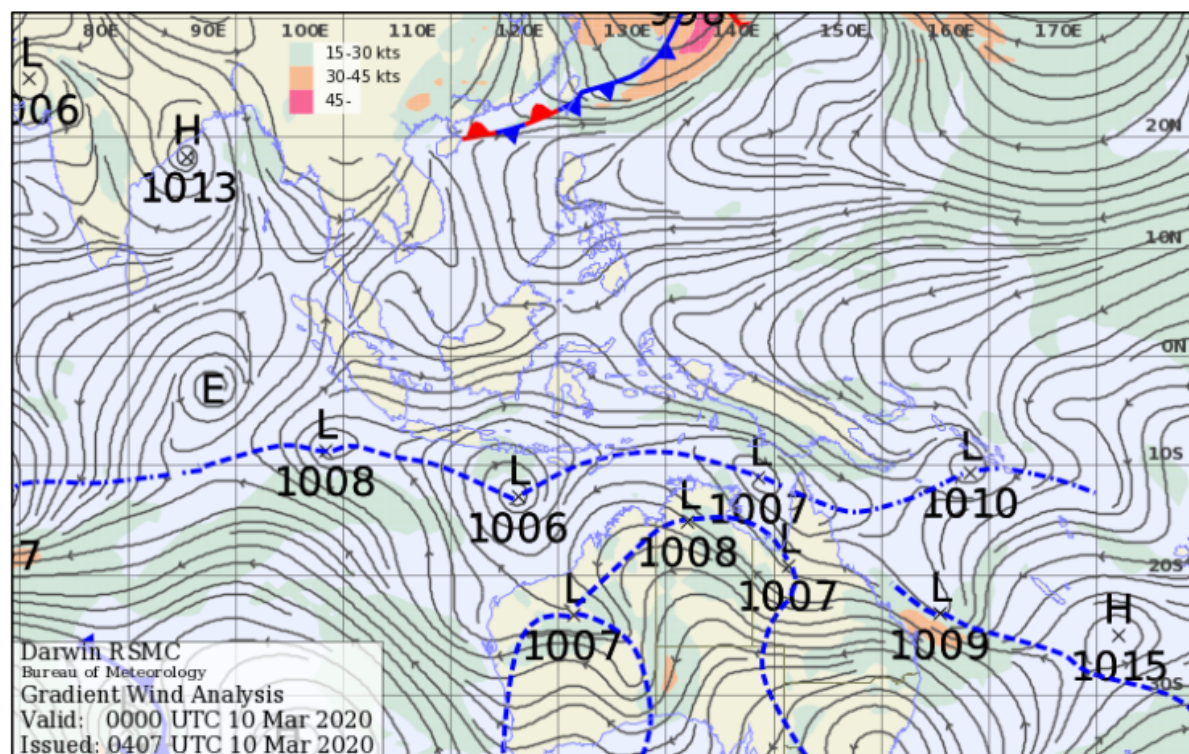

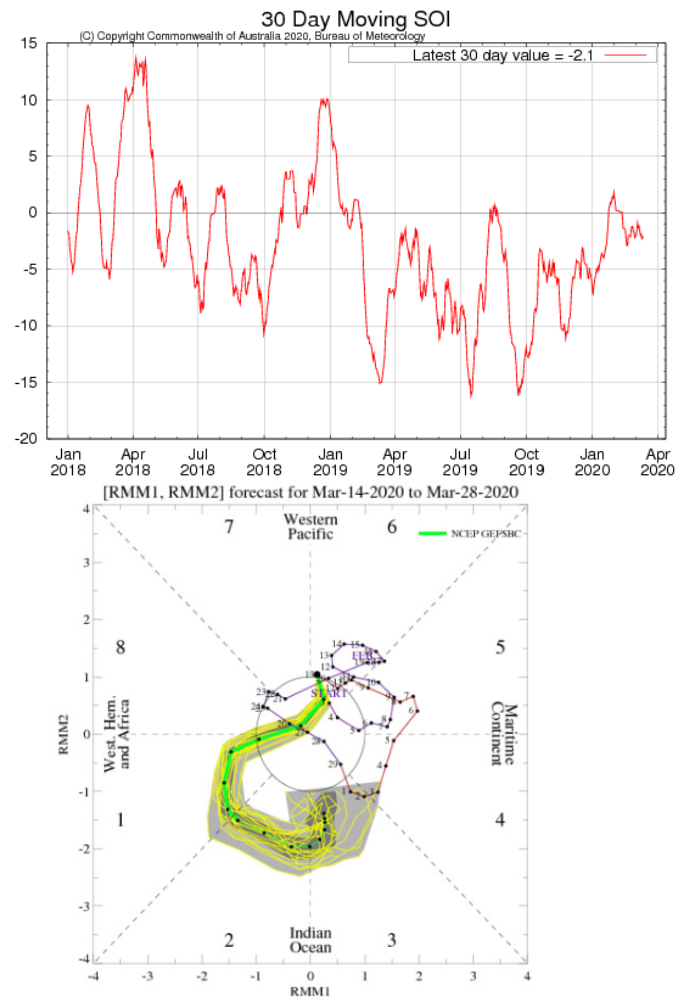

### Satellite Images (CIT = Central Indonesian Time)

**08 March 2020, 13:20 CIT**

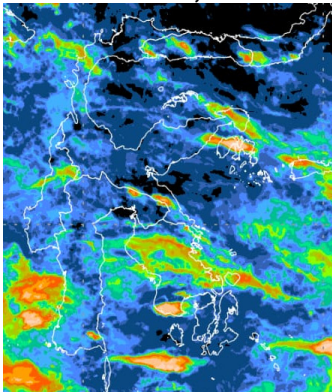

**09 March 2020, 15:40 CIT**

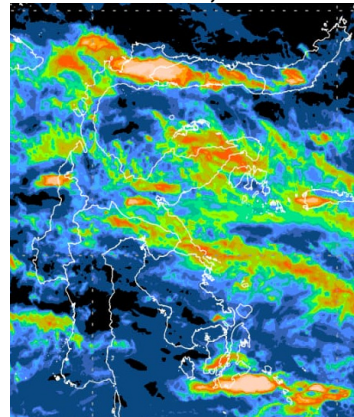

10 March 2020, 14:40 CIT

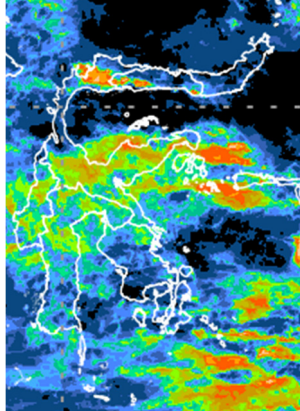

11 March 2020, 16:10 CIT

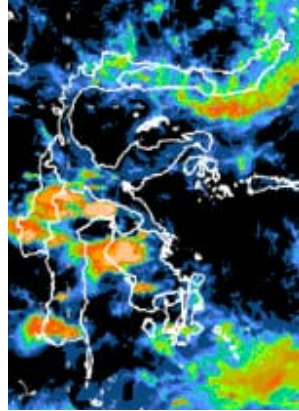

12 March 2020, 15:20 CIT

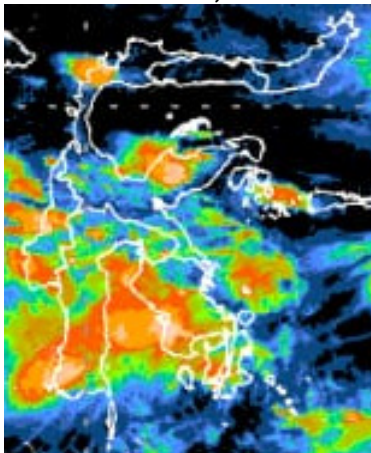

13 March 2020, 13:10 CIT

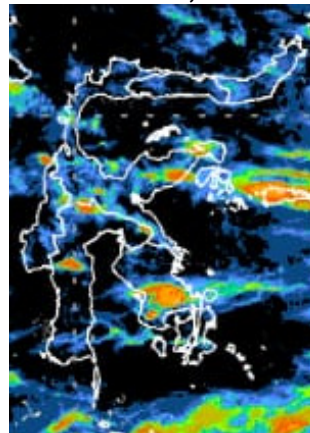

14 March 2020, 17:40 CIT

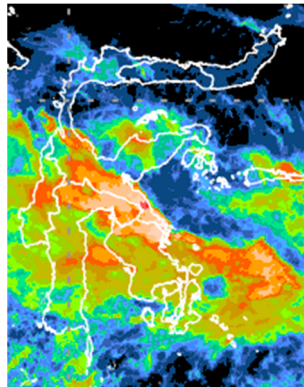

Supplement: s1 [file s1 › Weekly Report - 05.pdf]
