# Supplementary material for: Hygroscopic Ground-Based Generator Cloud Seeding Design; A Case Study from the 2020 Weather Modification in Larona Basin Indonesia
Source: MDPI journal article supplement (doi:10.3390/atmos13060968), 2022-06-15

**Weekly Report (#6)**  
**15 March – 21 March 2020**

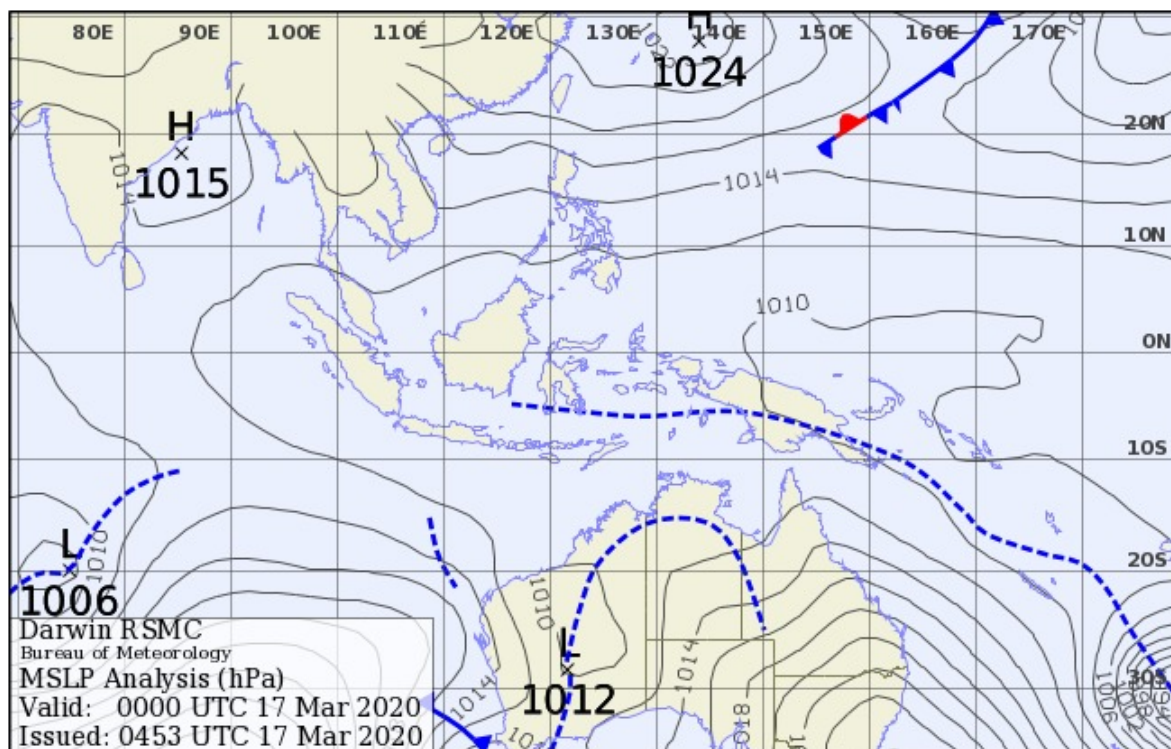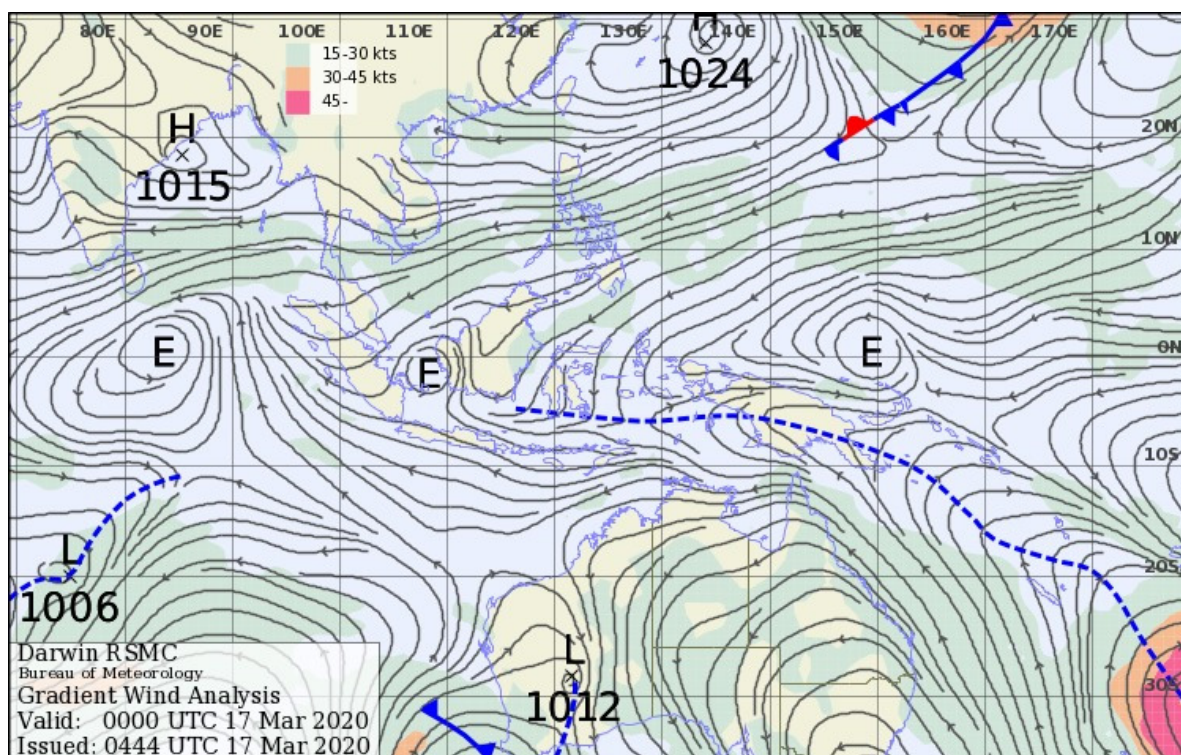

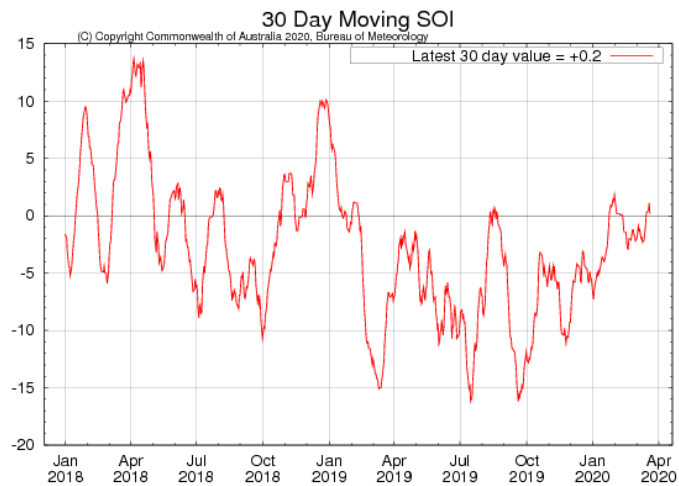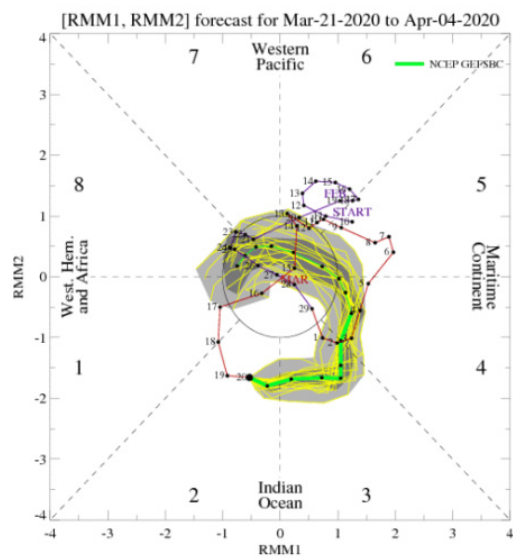

## Satellite Images (CIT = Central Indonesian Time)

15 March 2020, 17:40 CIT

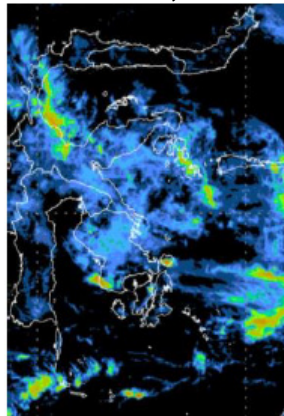

16 March 2020, 17:40 CIT

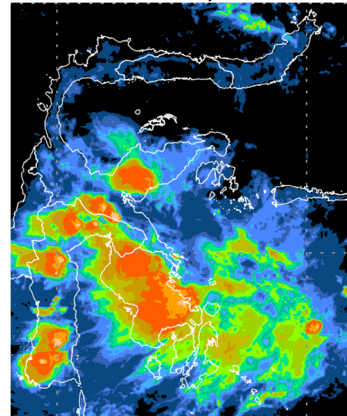

17 March 2020, 13:40 CIT

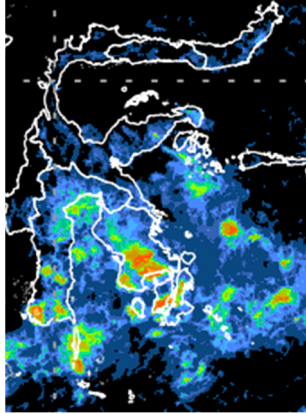

18 March 2020, 16:40 CIT

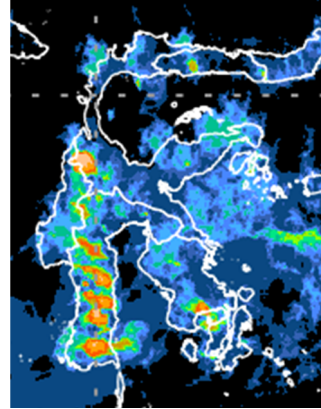

19 March 2020, 17:50 CIT

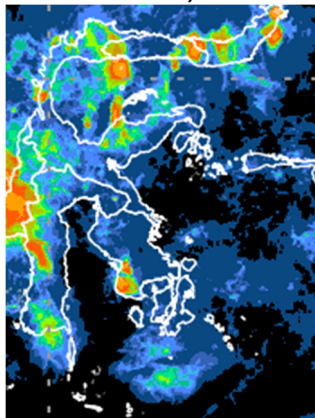

20 March 2020, 14:40 CIT

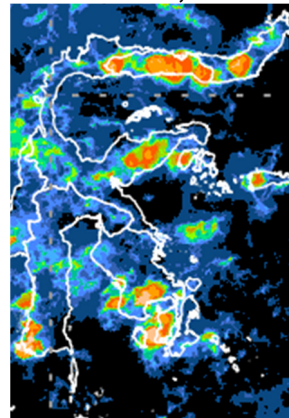

21 March 2020, 14:00 CIT

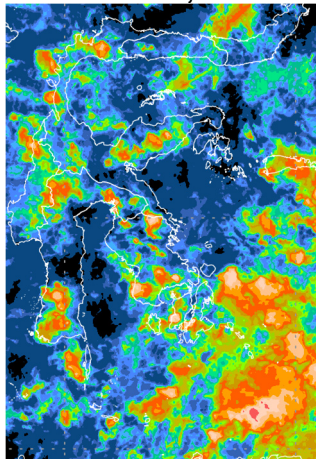

Supplement: s1 [file s1 › Weekly Report - 06.pdf]
