# Supplementary material for: Hygroscopic Ground-Based Generator Cloud Seeding Design; A Case Study from the 2020 Weather Modification in Larona Basin Indonesia
Source: MDPI journal article supplement (doi:10.3390/atmos13060968), 2022-06-15

**Weekly Report (#7)**  
**22 March – 28 March 2020**

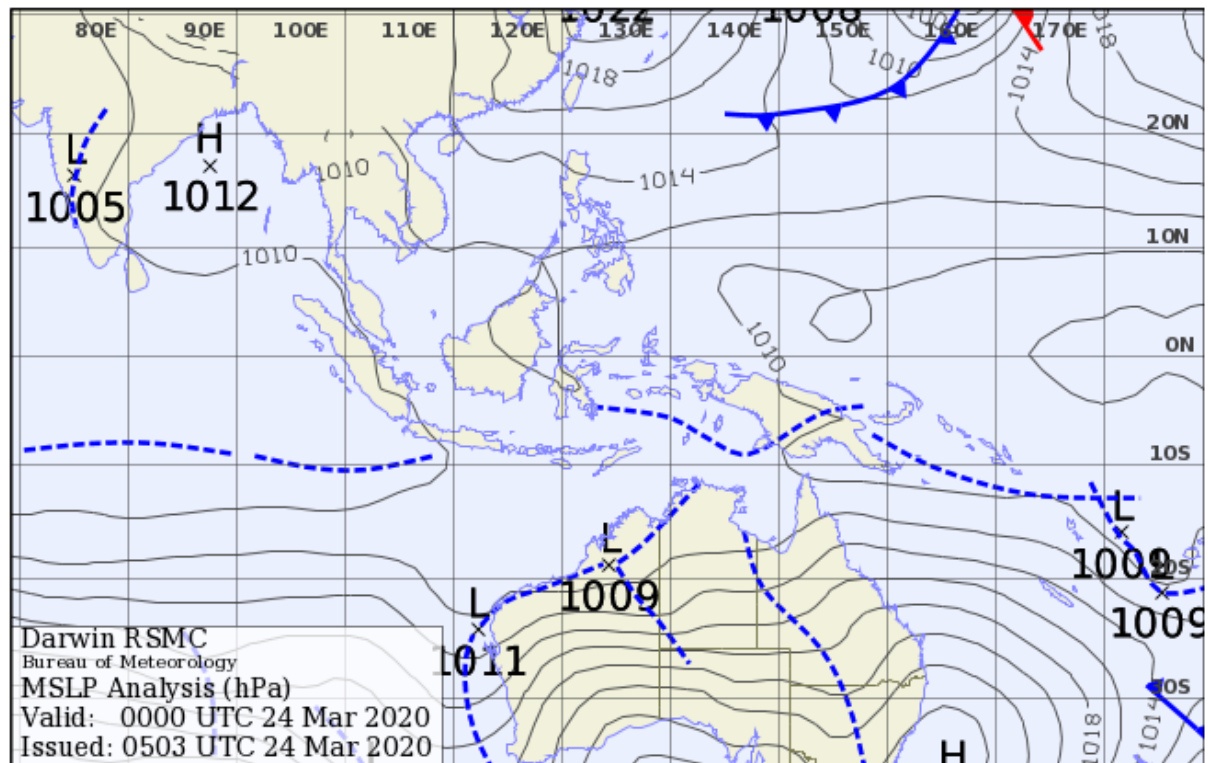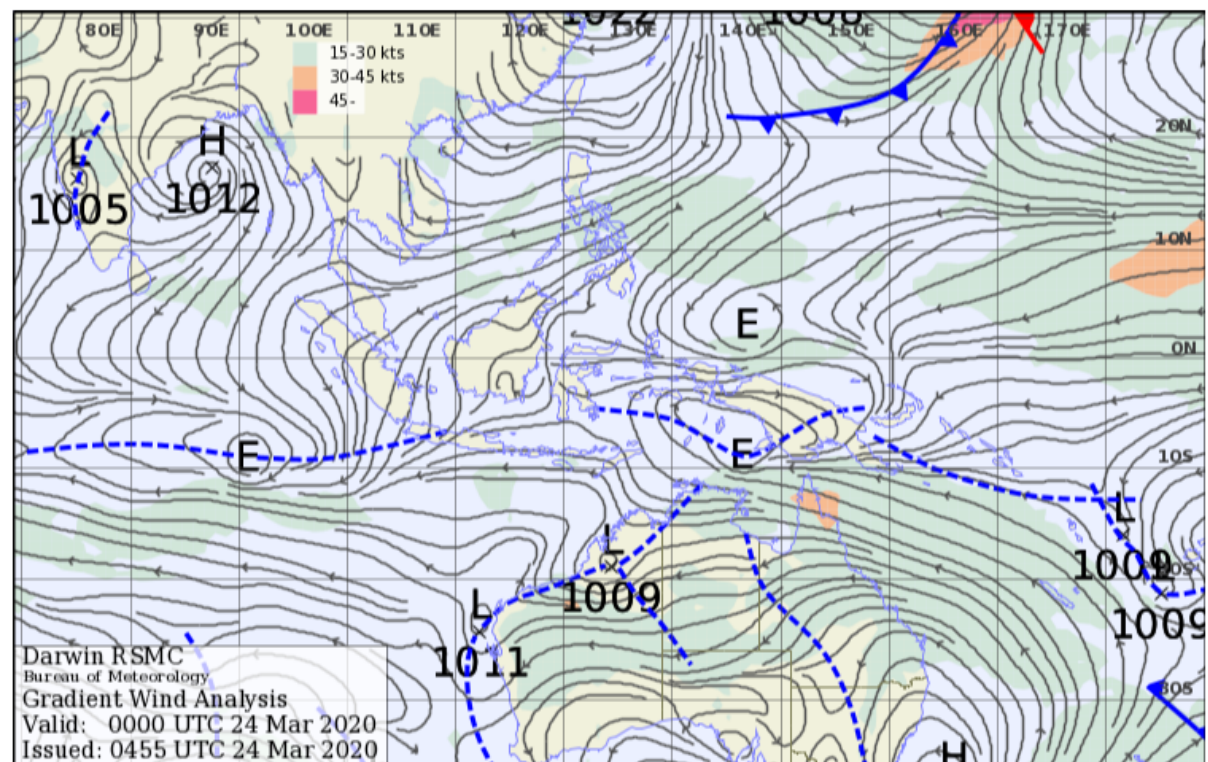

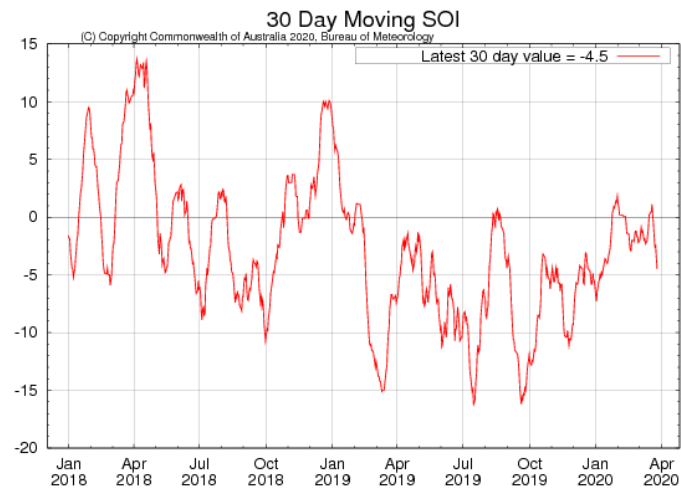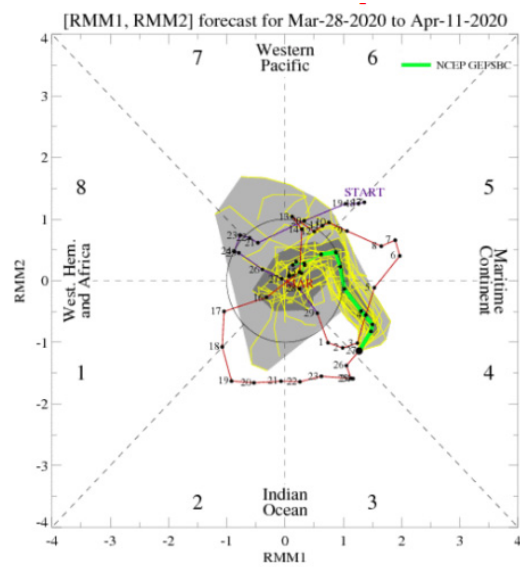

## Satellite Images (CIT = Central Indonesian Time)

**22 March 2020, 13:50 CIT**

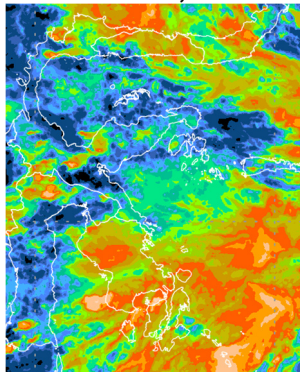

**23 March 2020, 17:00 CIT**

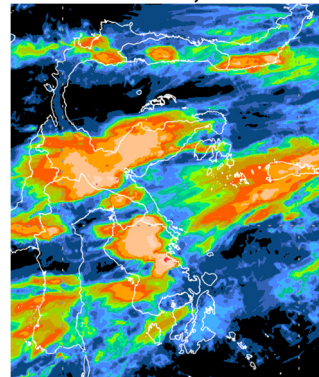

**24 March 2020, 16:50 CIT**

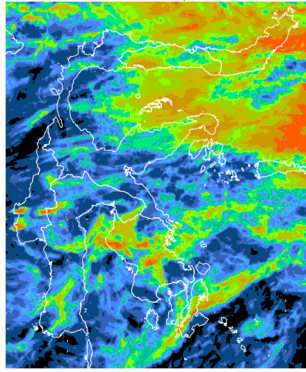

**25 March 2020, 17:00 CIT**

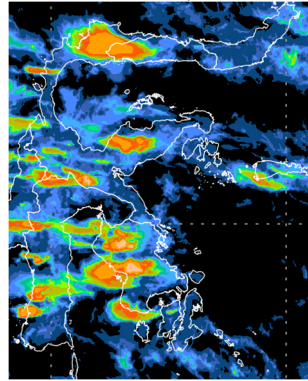

**26 March 2020, 15:10 CIT**

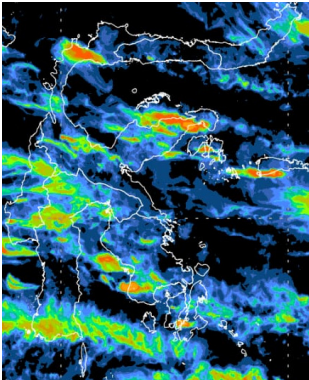

**27 March 2020, 14:30 CIT**

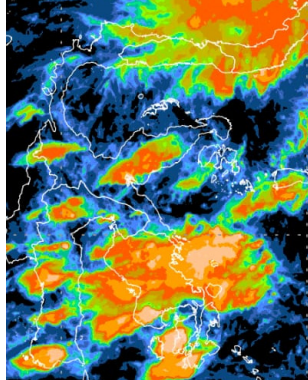

**28 March 2020, 16:10 CIT**

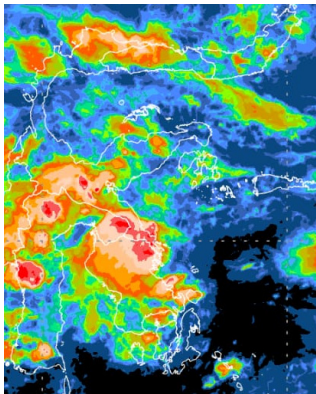

Supplement: s1 [file s1 › Weekly Report - 07.pdf]
