# Supplementary material for: Hygroscopic Ground-Based Generator Cloud Seeding Design; A Case Study from the 2020 Weather Modification in Larona Basin Indonesia
Source: MDPI journal article supplement (doi:10.3390/atmos13060968), 2022-06-15

*Weekly Report (#8)*  
*29 March – 04 April 2020*

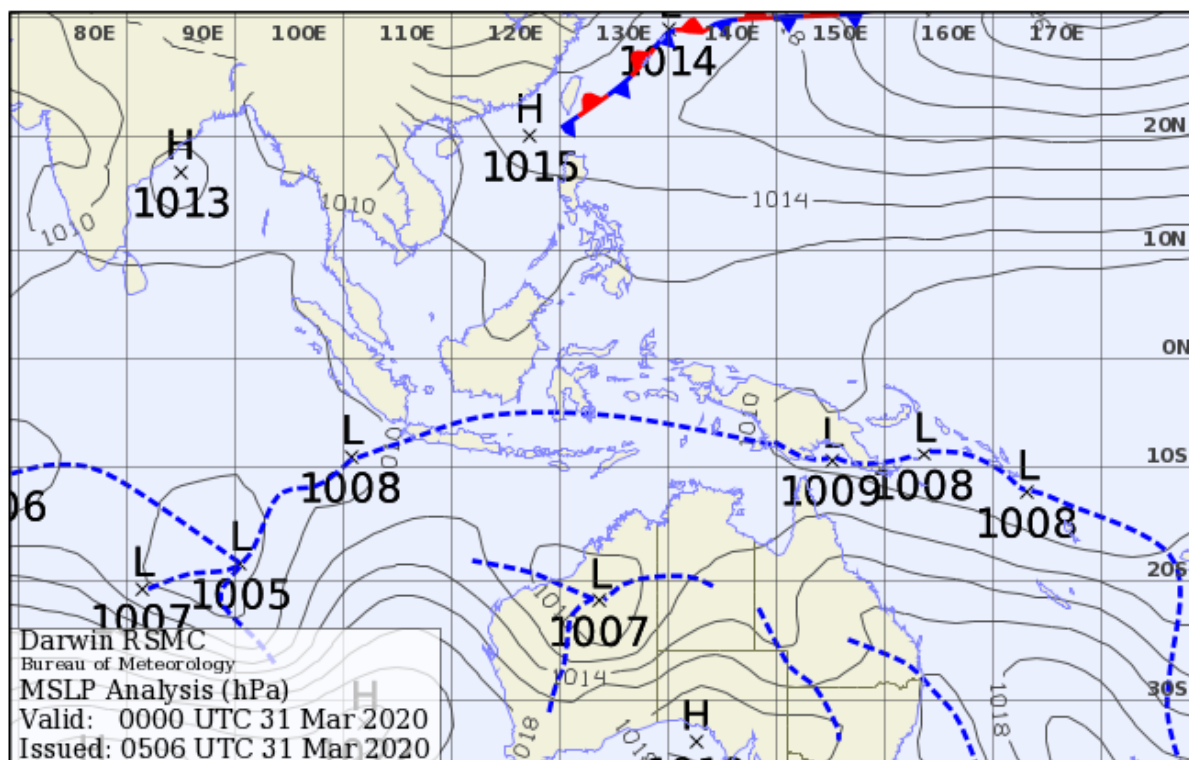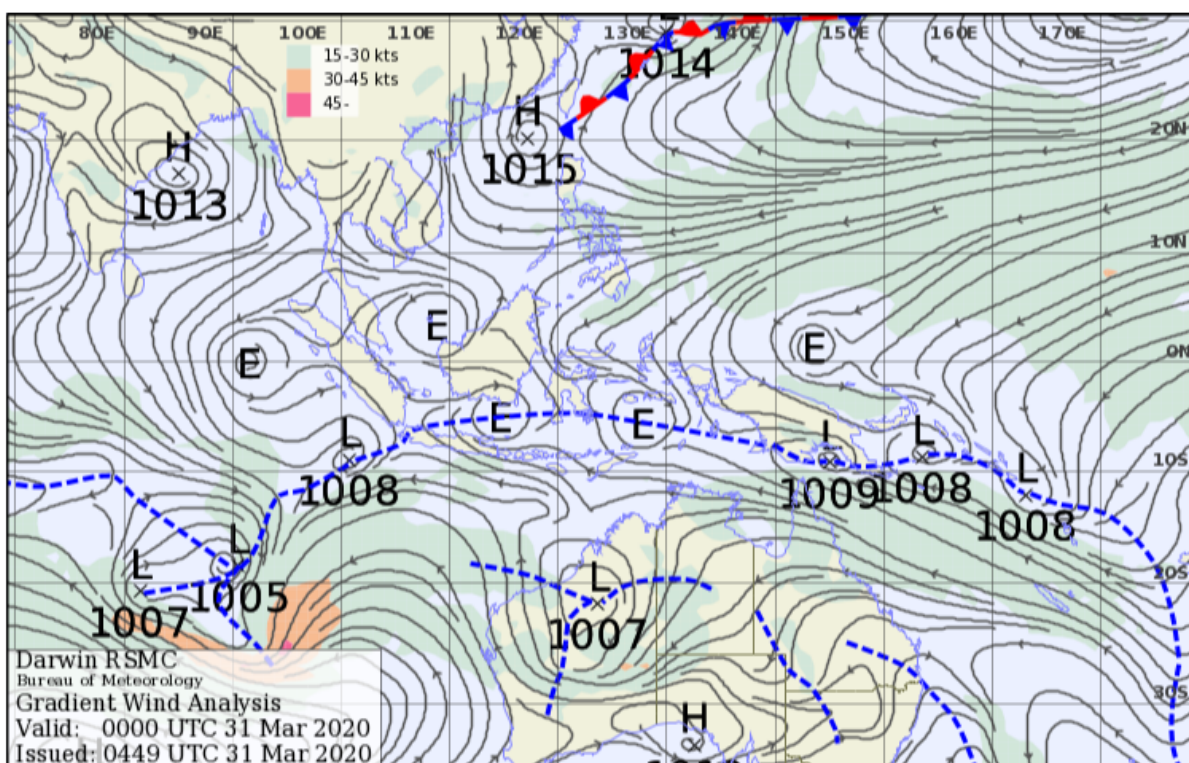

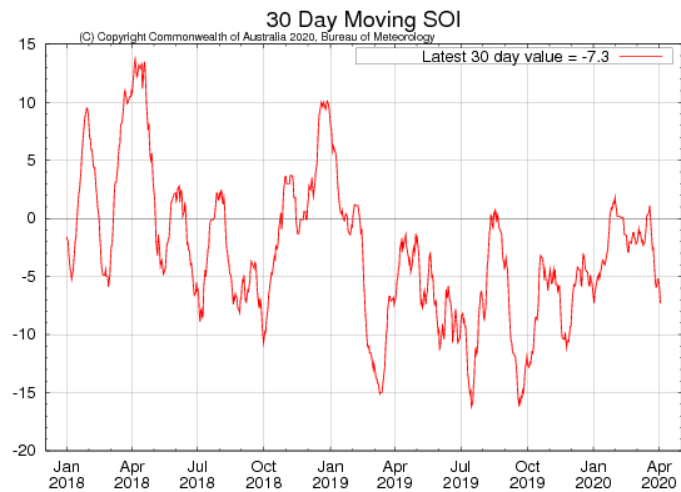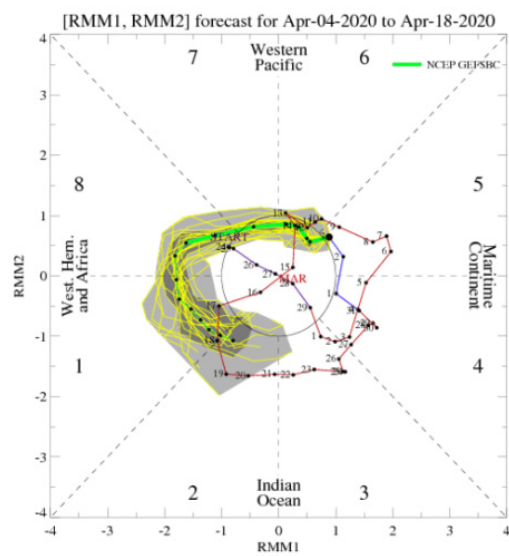

## Satellite Images (CIT = Central Indonesian Time)

**29 March 2020, 17:30 CIT**

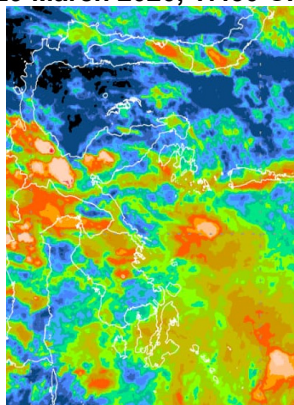

**30 March 2020, 13:40 CIT**

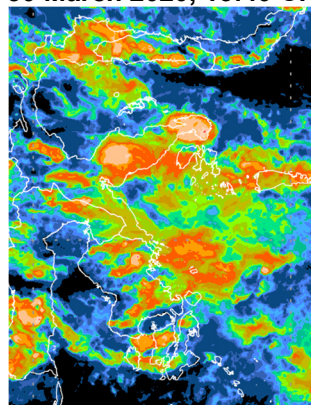

**31 March 2020, 15:30 CIT**

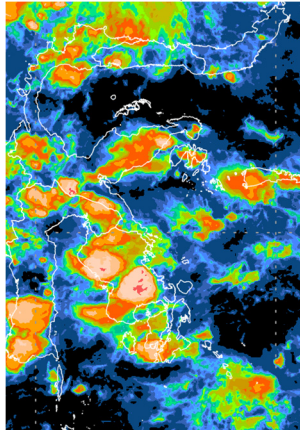

**01 April 2020, 14:10 CIT**

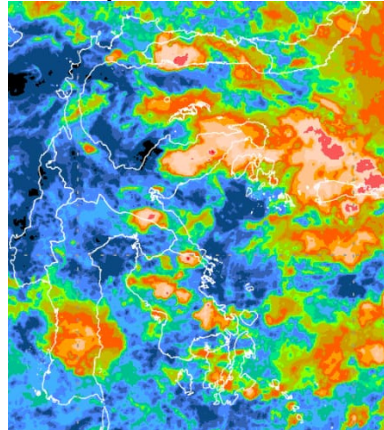

**02 April 2020, 18:30 CIT**

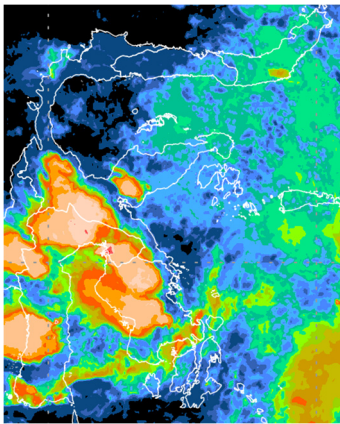

**03 April 2020, 17:20 CIT**

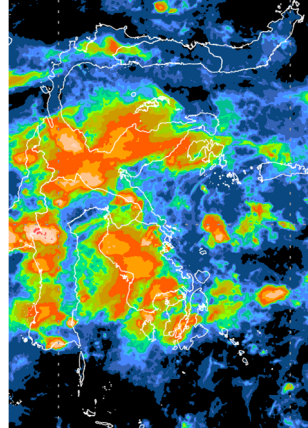

**04 April 2020, 17:40 CIT**

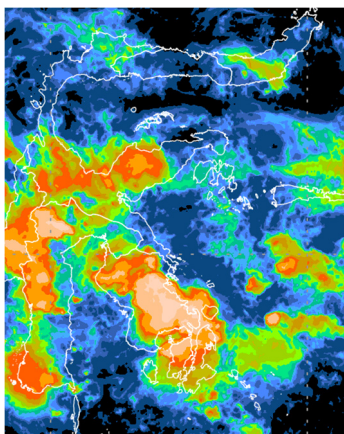

Supplement: s1 [file s1 › Weekly Report - 08.pdf]
