# Supplementary material for: Hygroscopic Ground-Based Generator Cloud Seeding Design; A Case Study from the 2020 Weather Modification in Larona Basin Indonesia
Source: MDPI journal article supplement (doi:10.3390/atmos13060968), 2022-06-15
Supplement: s1 [file s1 › Weekly Report - 09.pdf]

**Weekly Report (#9)**  
**05 April – 11 April 2020**

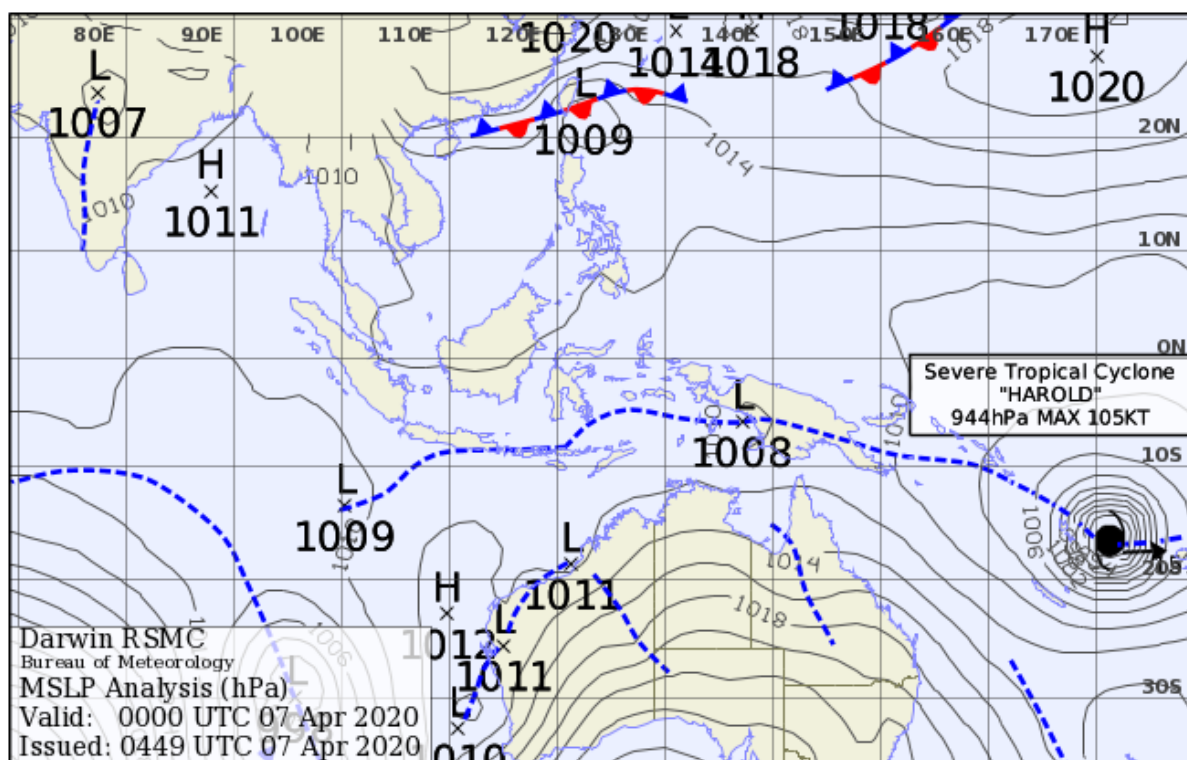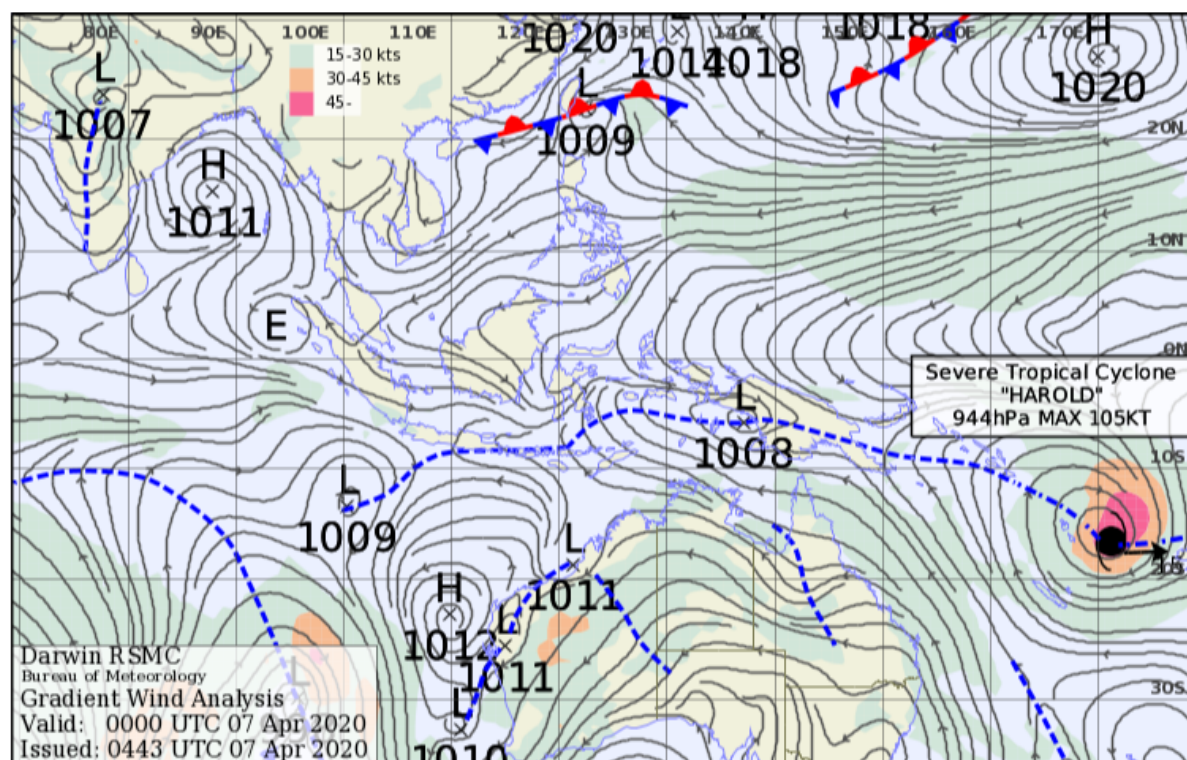

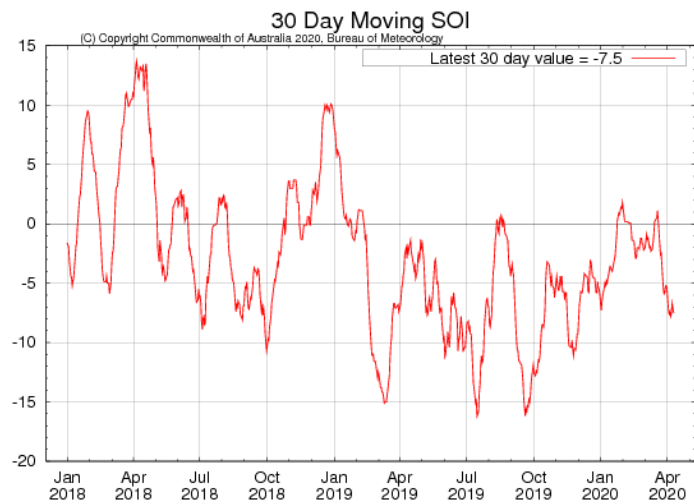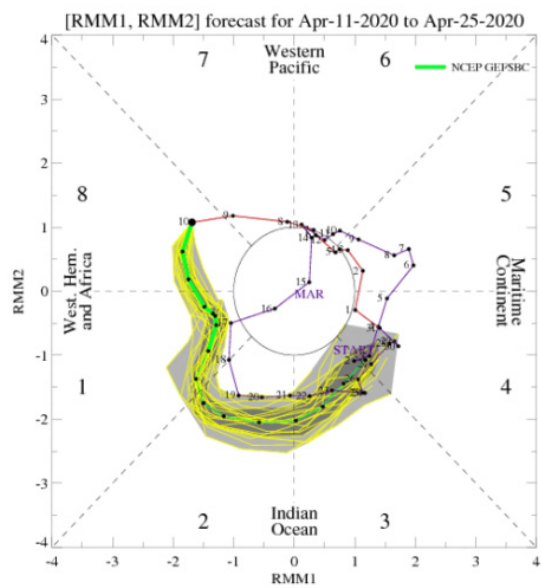

## Satellite Images (CIT = Central Indonesian Time)

**05 April 2020, 14:10 CIT**

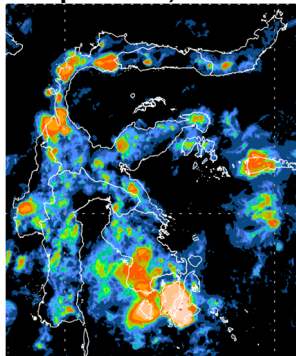

**06 April 2020, 13:00 CIT**

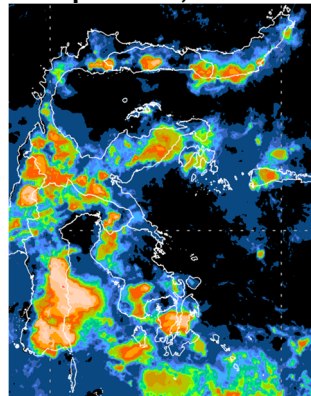

**07 April 2020, 16:10 CIT**

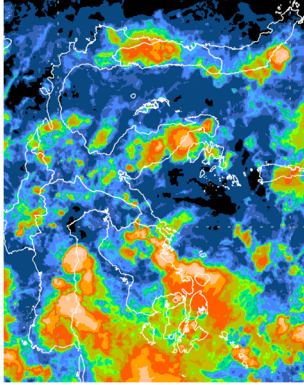

**08 April 2020, 15:50 CIT**

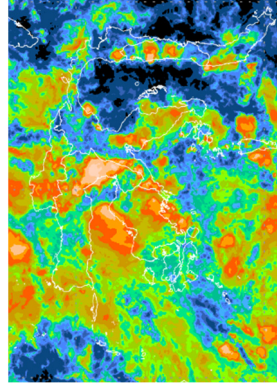

**09 April 2020, 18:20 CIT**

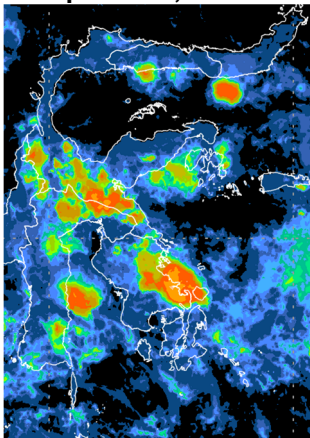

**10 April 2020, 12:40 CIT**

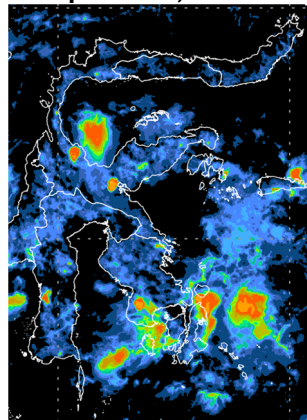

**11 April 2020, 17:40 CIT**

Photo Unavailable
