# Supplementary material for: Hygroscopic Ground-Based Generator Cloud Seeding Design; A Case Study from the 2020 Weather Modification in Larona Basin Indonesia
Source: MDPI journal article supplement (doi:10.3390/atmos13060968), 2022-06-15

**Weekly Report (#10)**  
**12 April – 18 April 2020**

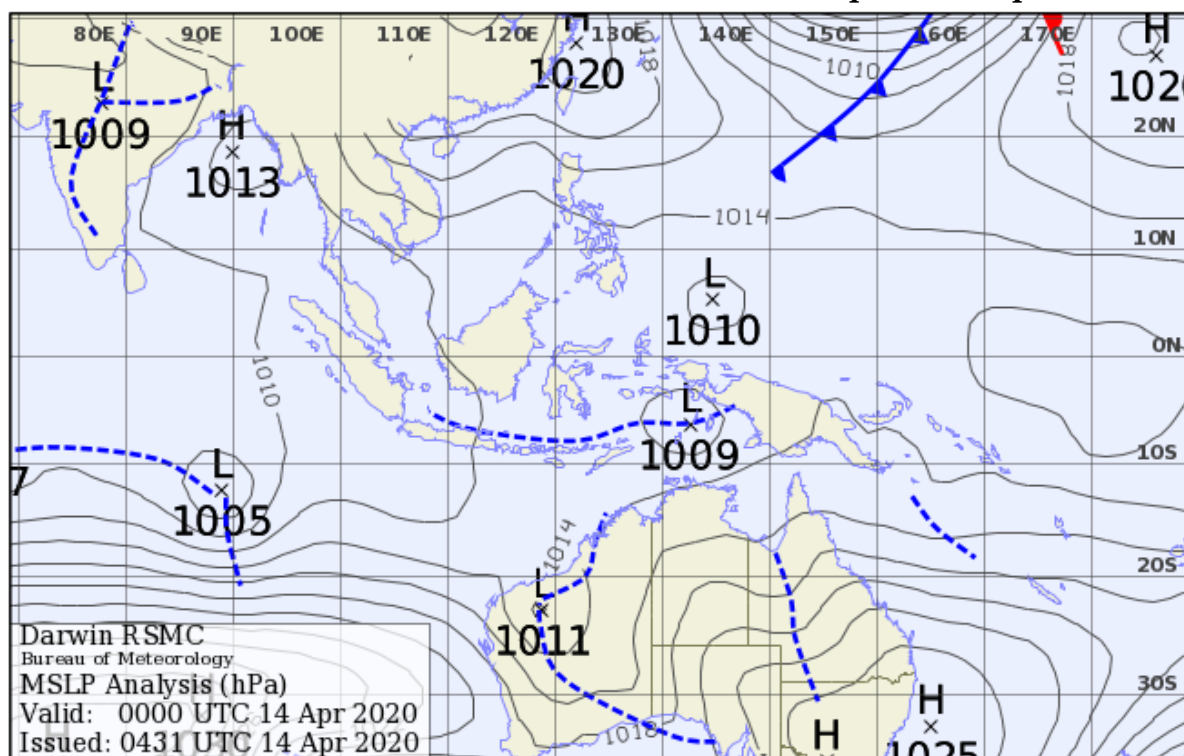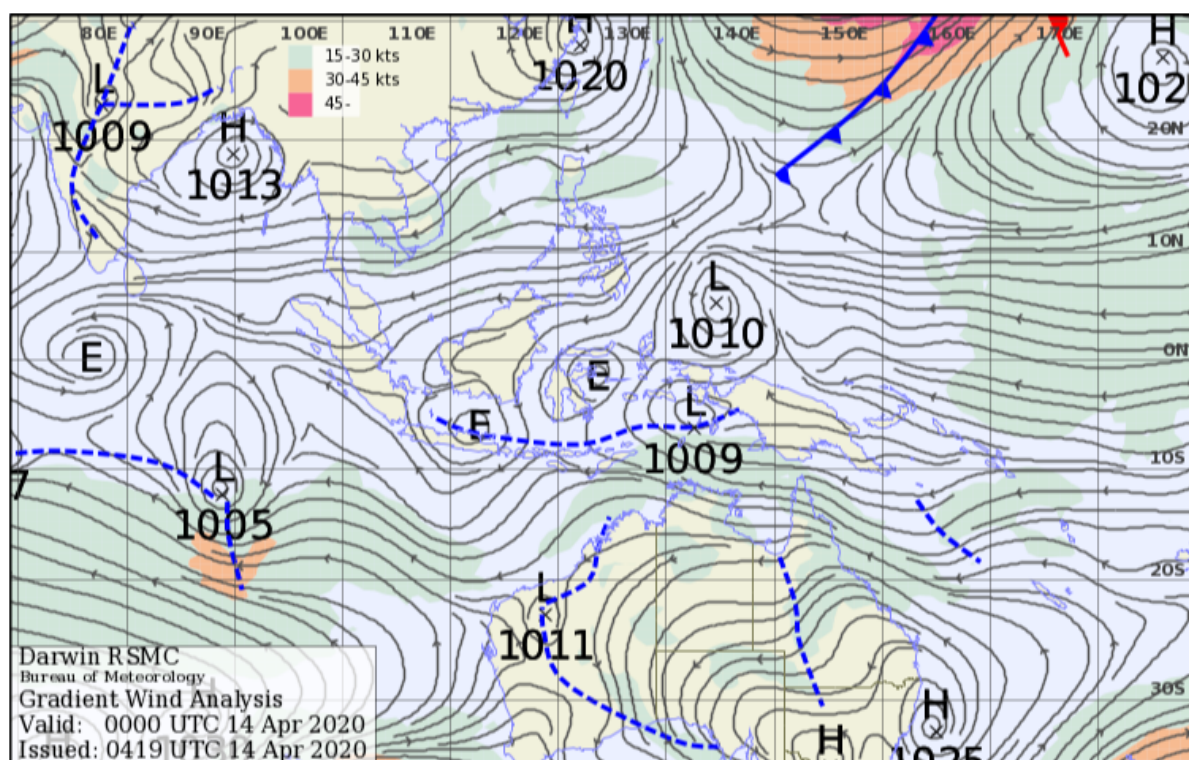

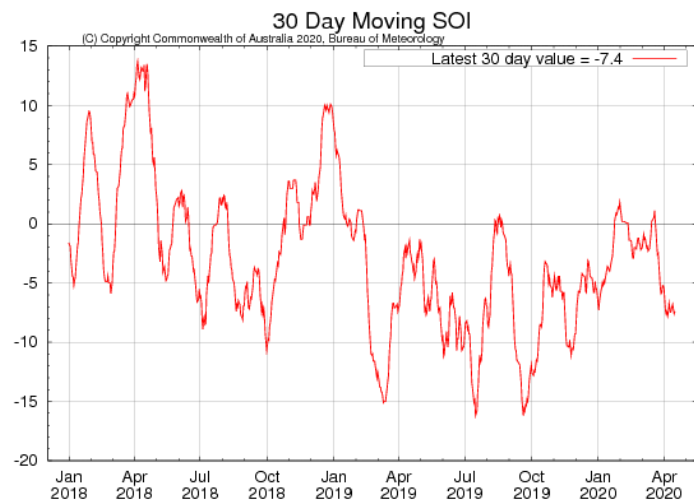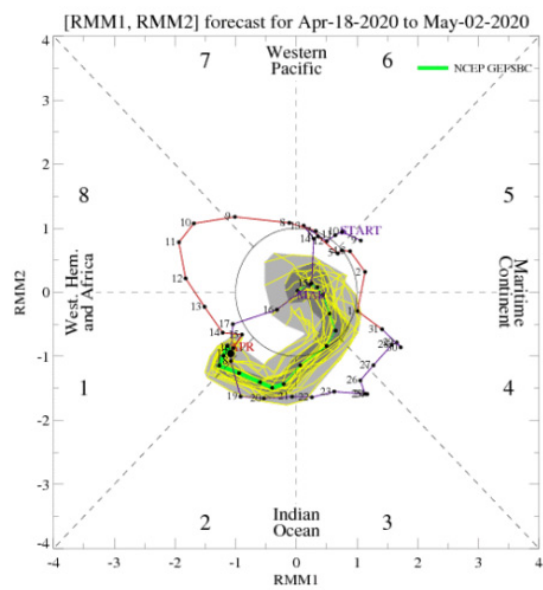

## Satellite Images (CIT = Central Indonesian Time)

**12 April 2020, 16:20 WITA**

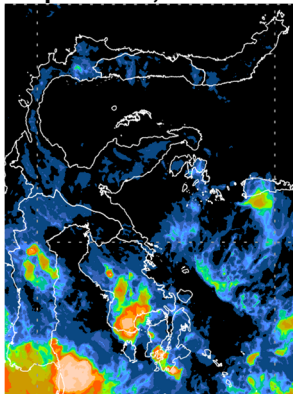

**13 April 2020, 13:00 WITA**

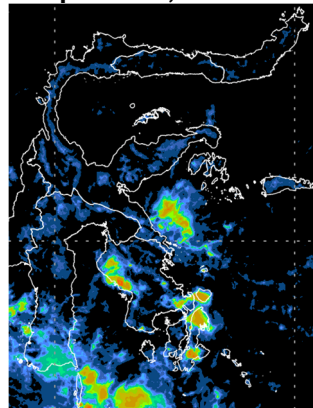

**14 April 2020, 15:30 WITA**

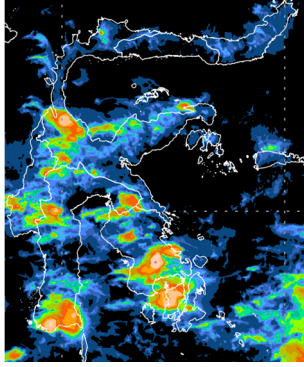

**15 April 2020, 14:50 WITA**

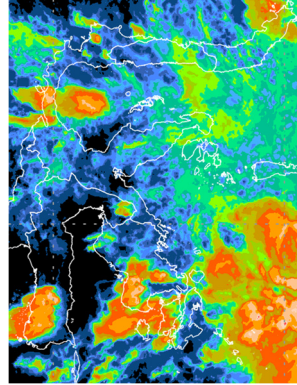

**16 April 2020, 14:40 WITA**

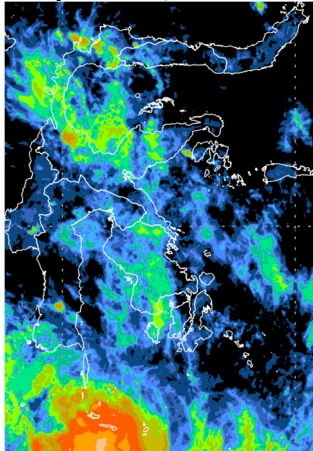

**17 April 2020, 14:10 WITA**

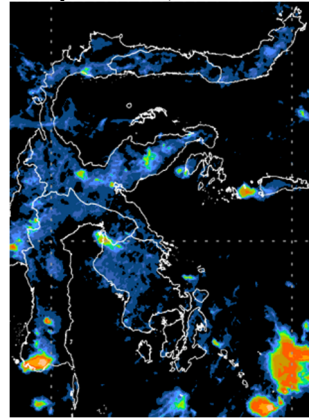

**18 April 2020, 12:40 WITA**

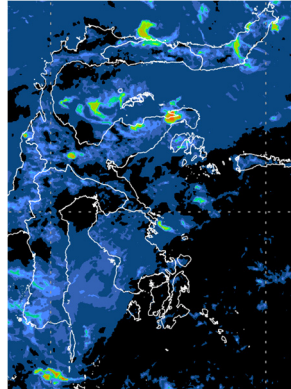

Supplement: s1 [file s1 › Weekly Report - 10.pdf]
