# Supplementary material for: Hygroscopic Ground-Based Generator Cloud Seeding Design; A Case Study from the 2020 Weather Modification in Larona Basin Indonesia
Source: MDPI journal article supplement (doi:10.3390/atmos13060968), 2022-06-15

***Weekly Report (#11)***  
***19 April – 25 April 2020***

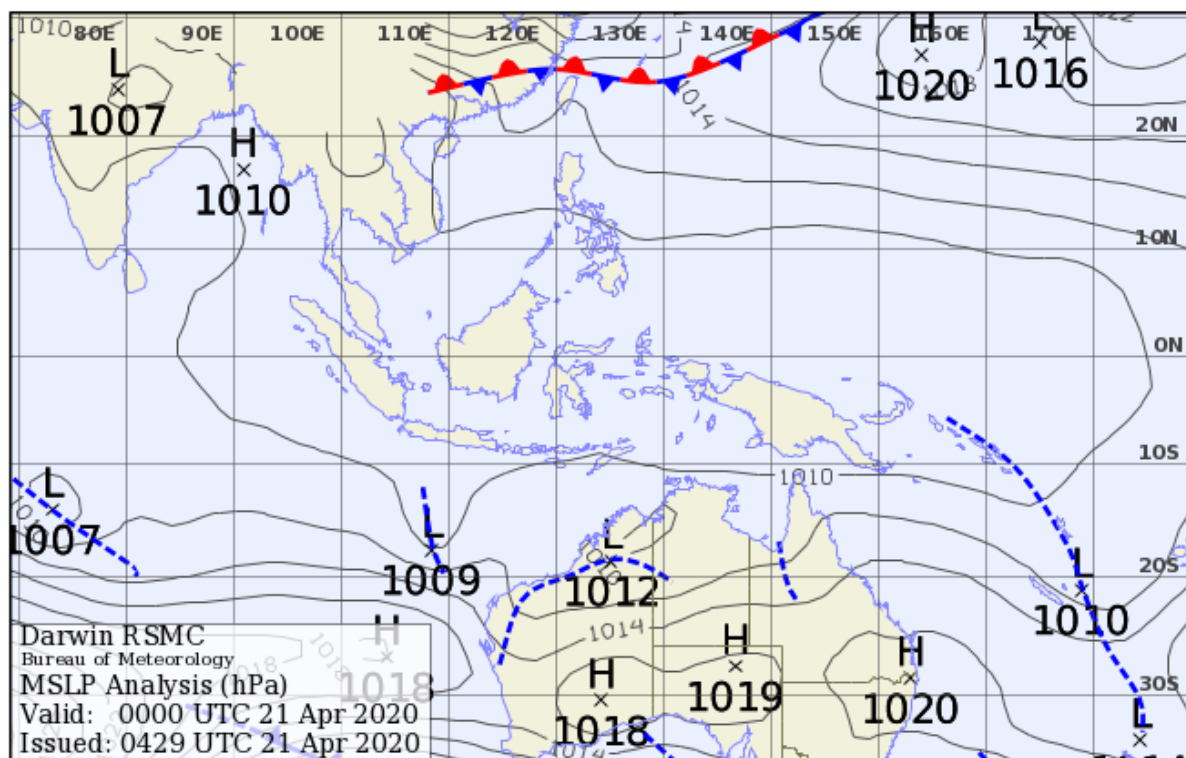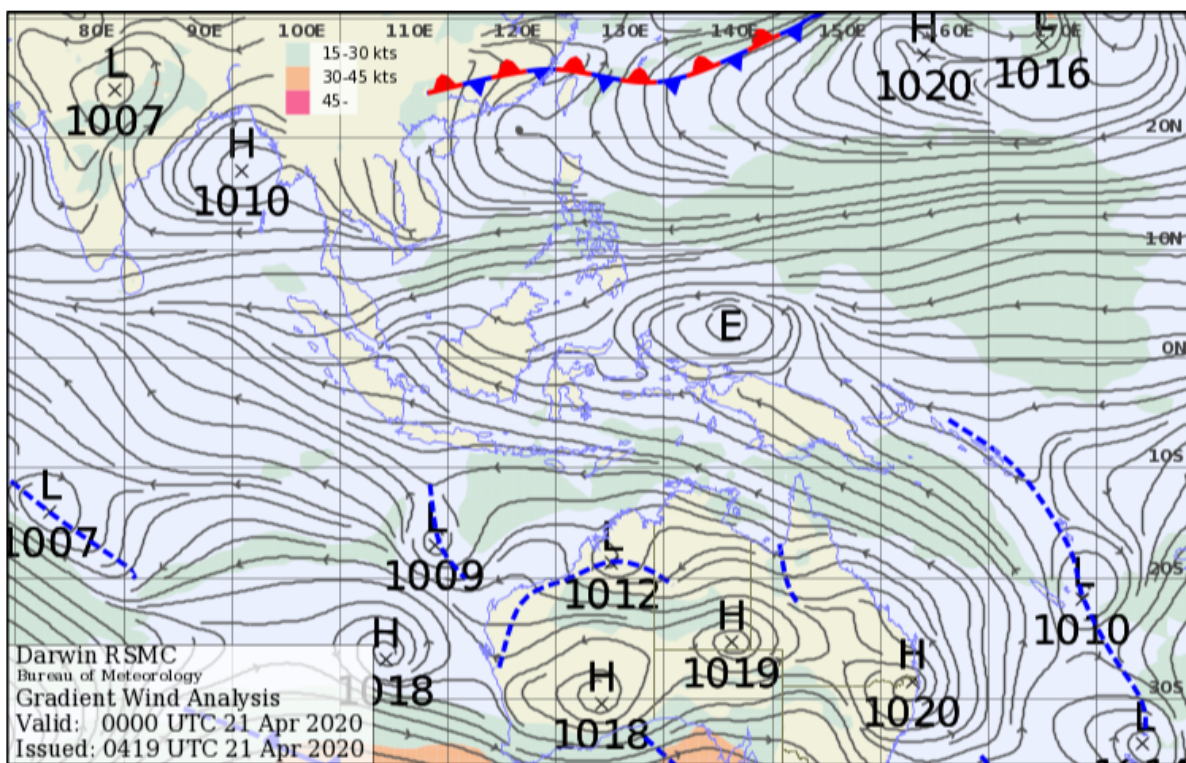

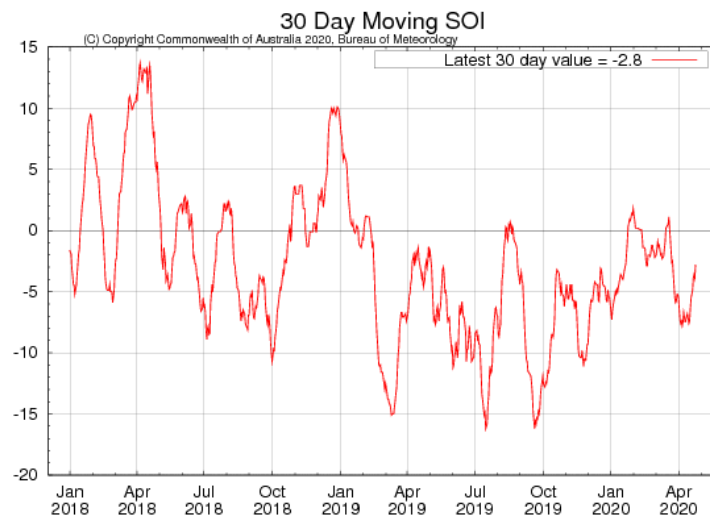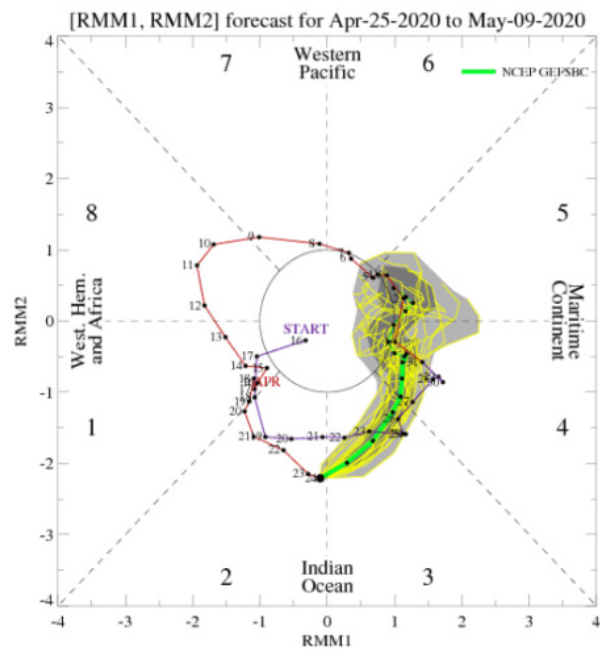

### Satellite Images (CIT = Central Indonesian Time)

**19 April 2020, 14:00 CIT**

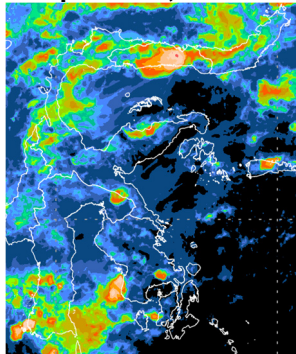

**20 April 2020, 13:00 CIT**

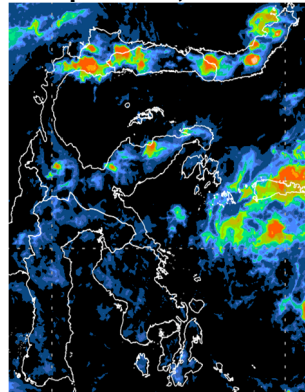

**21 April 2020, 14:00 CIT**

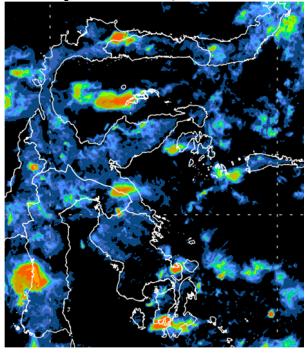

**22 April 2020, 13:20 CIT**

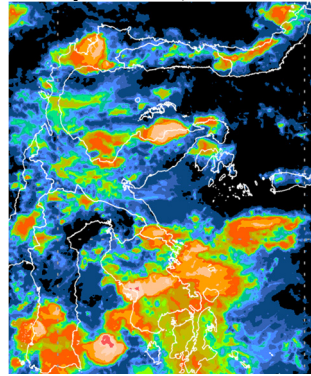

**23 April 2020, 13:10 CIT**

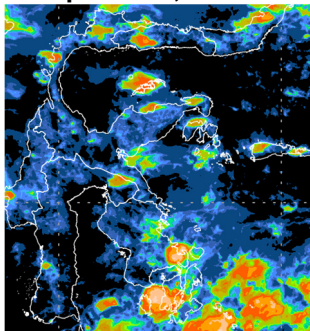

**24 April 2020, 12:10 CIT**

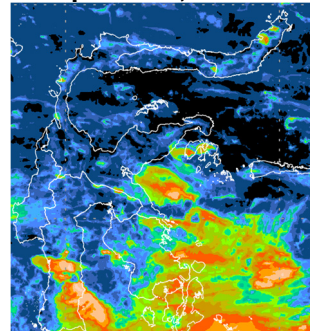

**25 April 2020, 14:00 CIT**

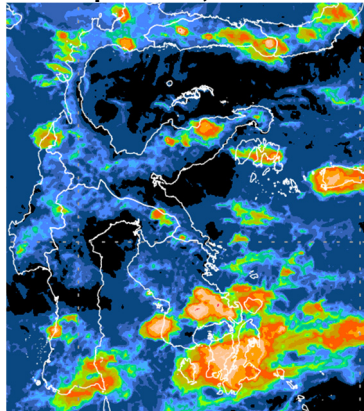

Supplement: s1 [file s1 › Weekly Report - 11.pdf]
