# Supplementary material for: Hygroscopic Ground-Based Generator Cloud Seeding Design; A Case Study from the 2020 Weather Modification in Larona Basin Indonesia
Source: MDPI journal article supplement (doi:10.3390/atmos13060968), 2022-06-15

## Weekly Report (#12)

26 April – 02 May 2020

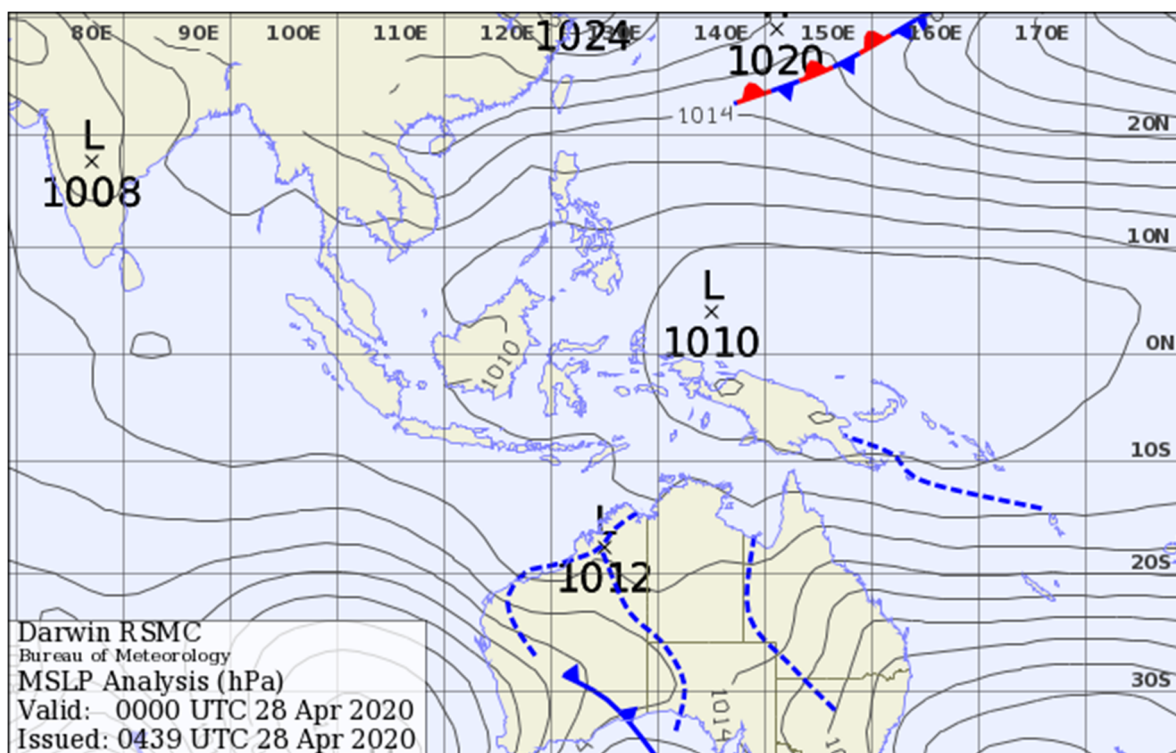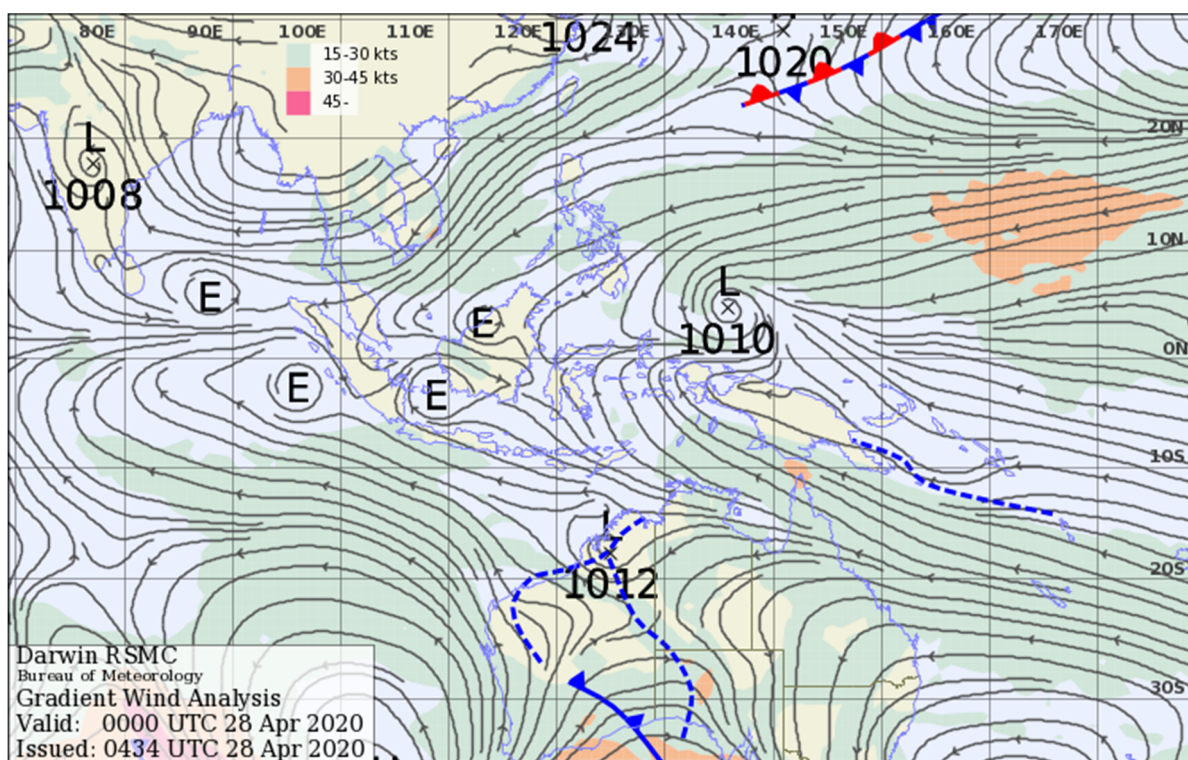

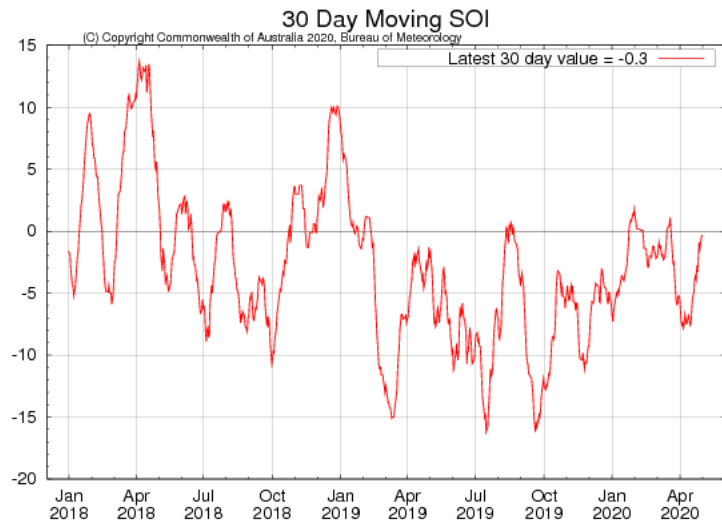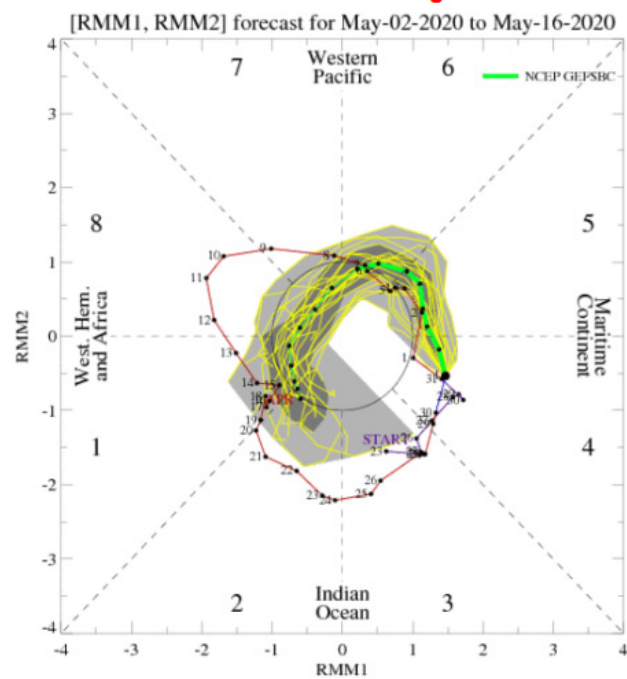

### Satellite Images (CIT = Central Indonesian Time)

**26 April 2020, 16:50 CIT**

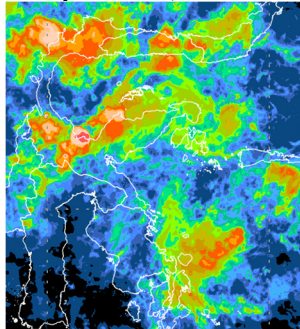

**27 April 2020, 11:40 CIT**

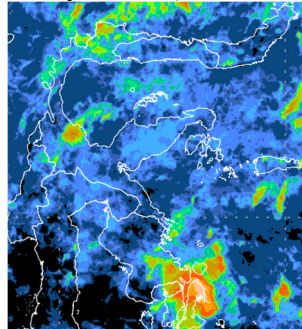

**28 April 2020, 14:30 CIT**

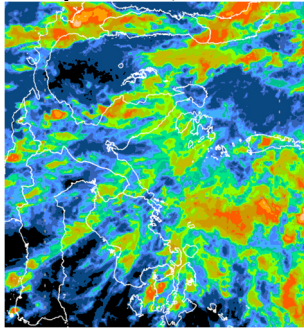

**29 April 2020, 15:50 CIT**

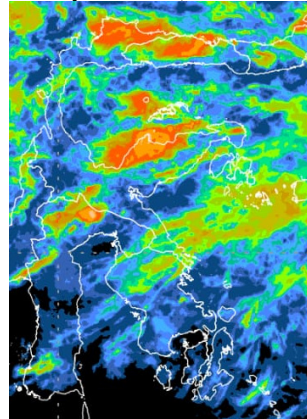

**30 April 2020, 13:20 CIT**

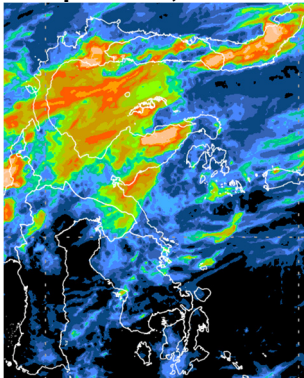

**01 May 2020, 12:30 CIT**

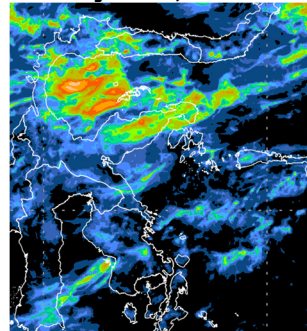

**02 May 2020, 13:00 CIT**

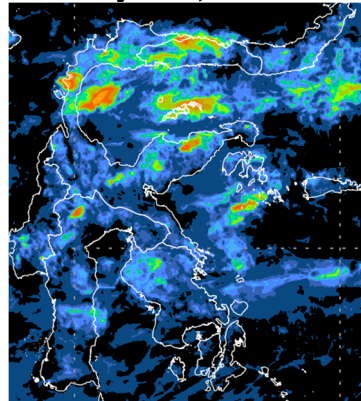

Supplement: s1 [file s1 › Weekly Report - 12.pdf]
