# Supplementary material for: Hygroscopic Ground-Based Generator Cloud Seeding Design; A Case Study from the 2020 Weather Modification in Larona Basin Indonesia
Source: MDPI journal article supplement (doi:10.3390/atmos13060968), 2022-06-15

**Weekly Report (#13)**  
**03 May – 09 May 2020**

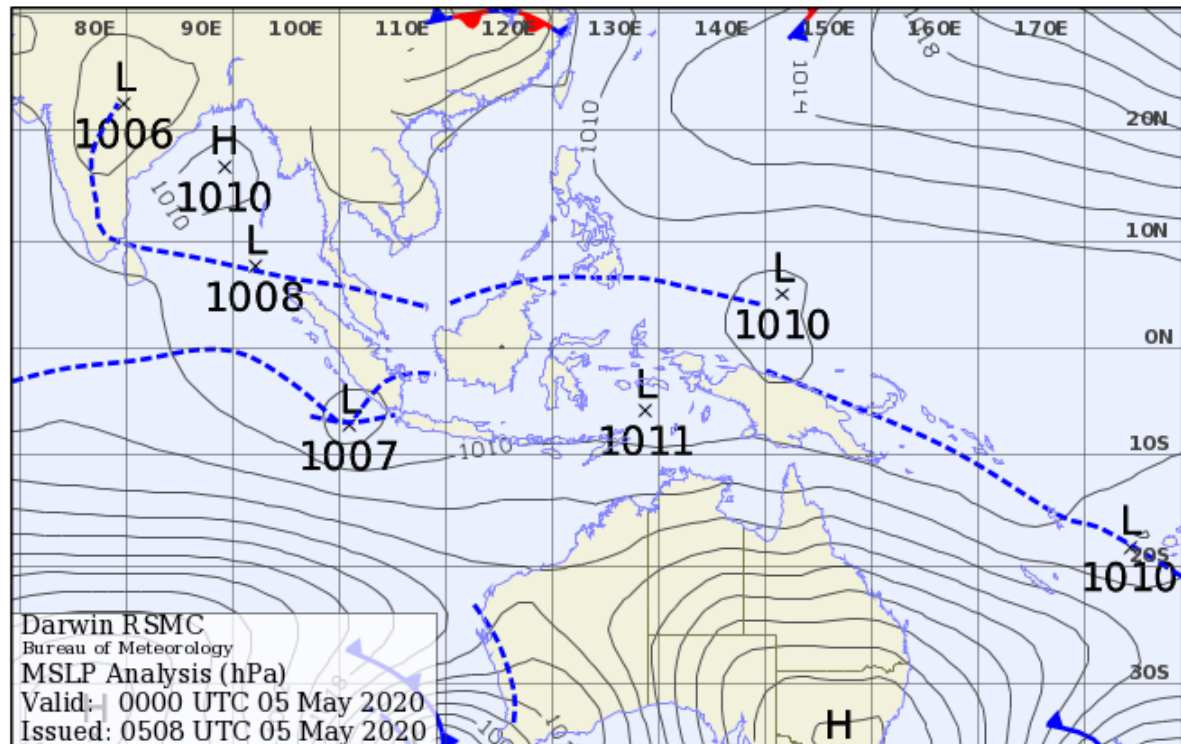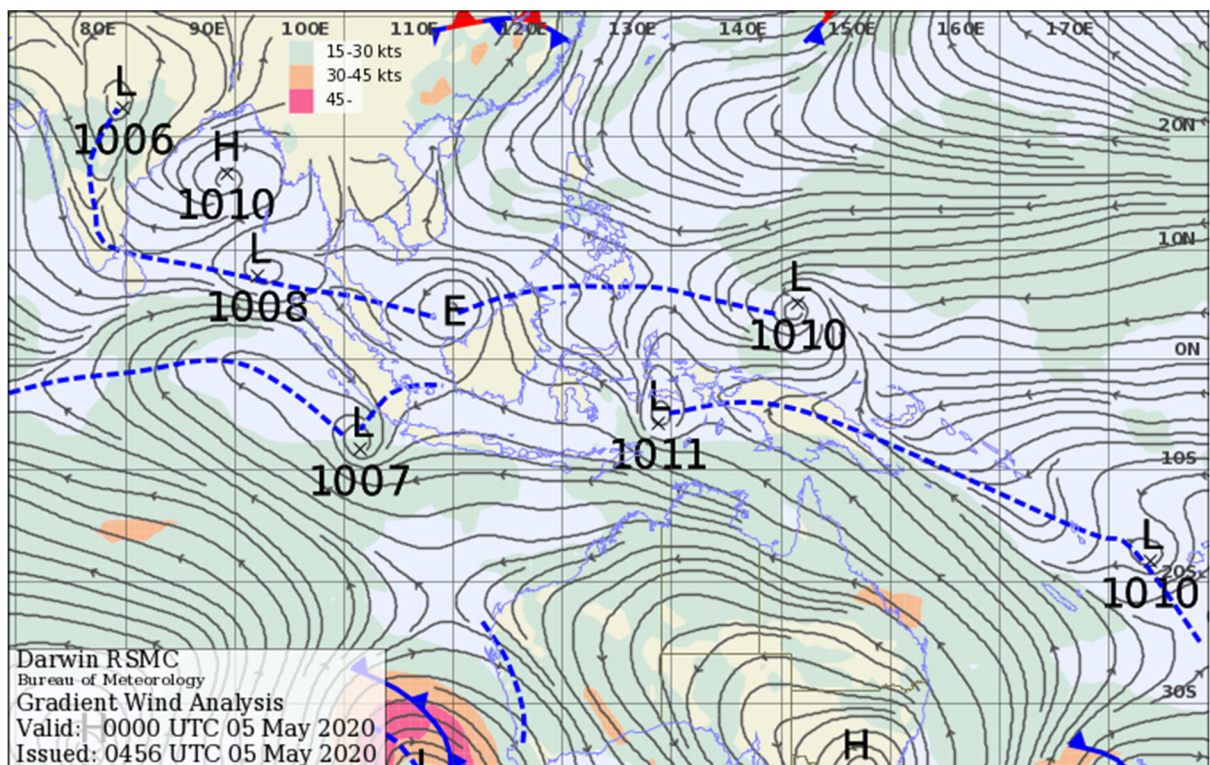

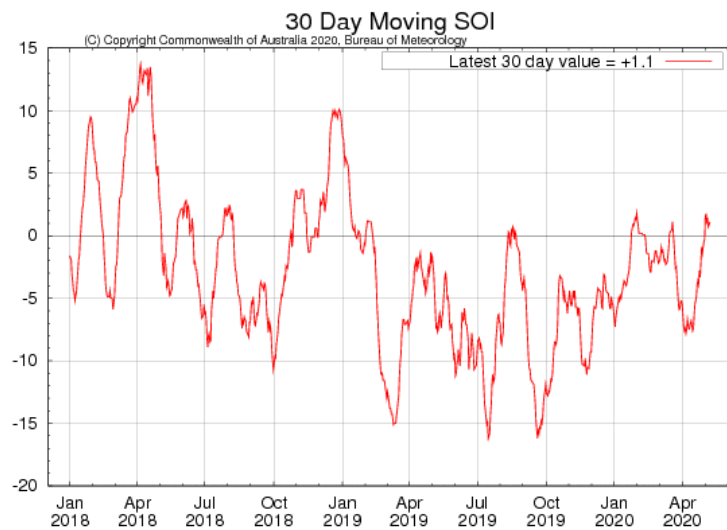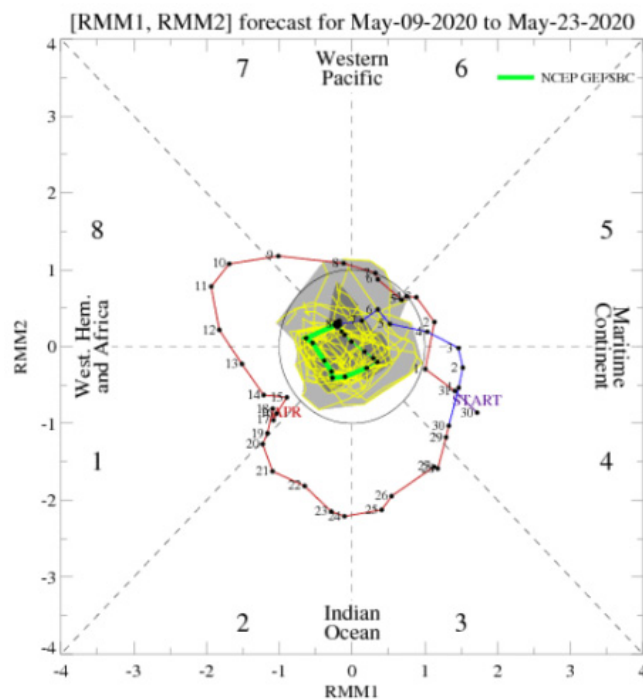

### Satellite Images (CIT = Central Indonesian Time)

**03 May 2020, 12:50 CIT**

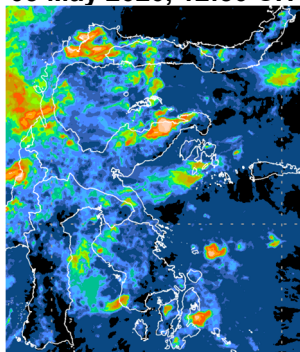

**04 May 2020, 12:50 CIT**

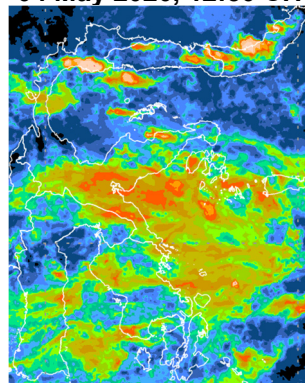

**05 May 2020, 11:20 CIT**

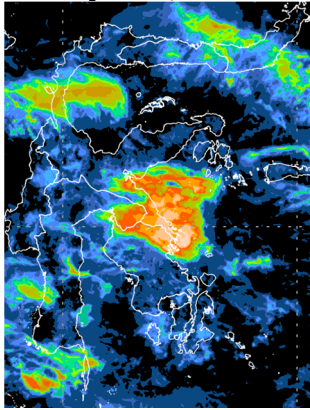

**06 May 2020, 12:00 CIT**

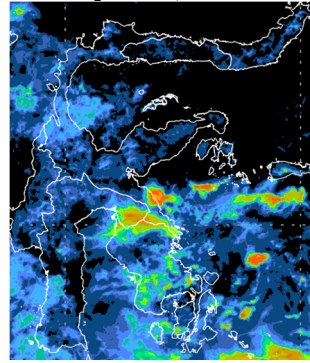

**07 May 2020, 15:30 CIT**

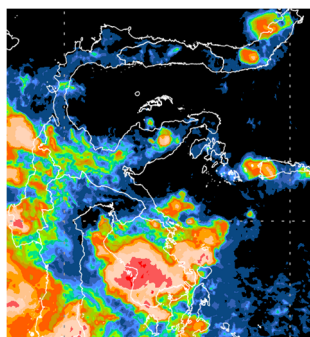

**08 May 2020, 11:50 CIT**

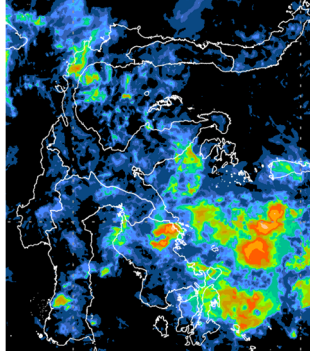

**09 May 2020, 09:50 CIT**

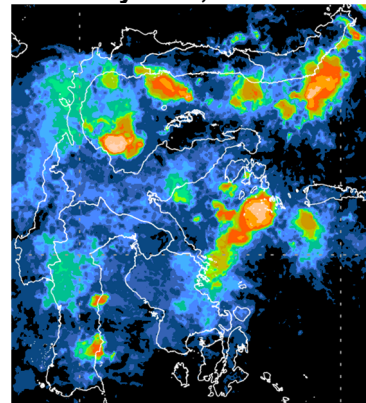

Supplement: s1 [file s1 › Weekly Report - 13.pdf]
